# Supplementary material for: A Transcriptomic Analysis of T98G Human Glioblastoma Cells after Exposure to Cadmium-Selenium Quantum Dots Mainly Reveals Alterations in Neuroinflammation Processes and Hypothalamus Regulation
Source: MDPI journal article supplement (doi:10.3390/ijms23042267), 2022-02-18
Supplement: s1 [file s1]

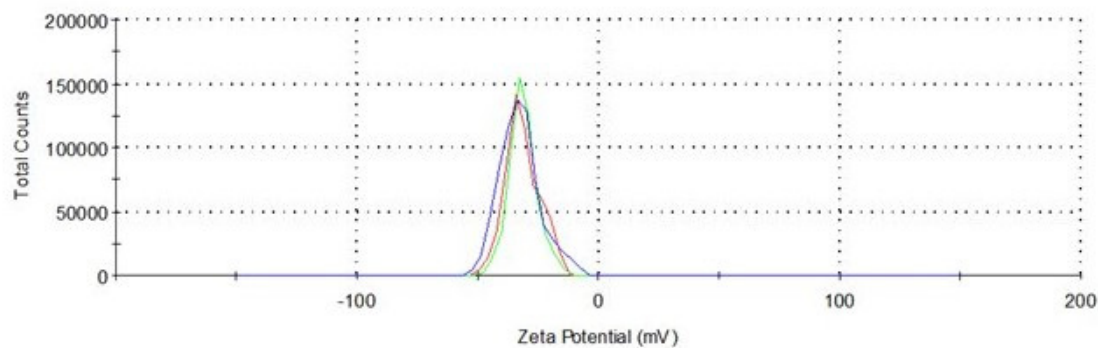

**Figure S1.** Analysis of the Z-potential for CdSe-QDs in type I water. Determinations were performed by Nanoimmunotech SL (<https://nanoimmunotech.eu/en>).

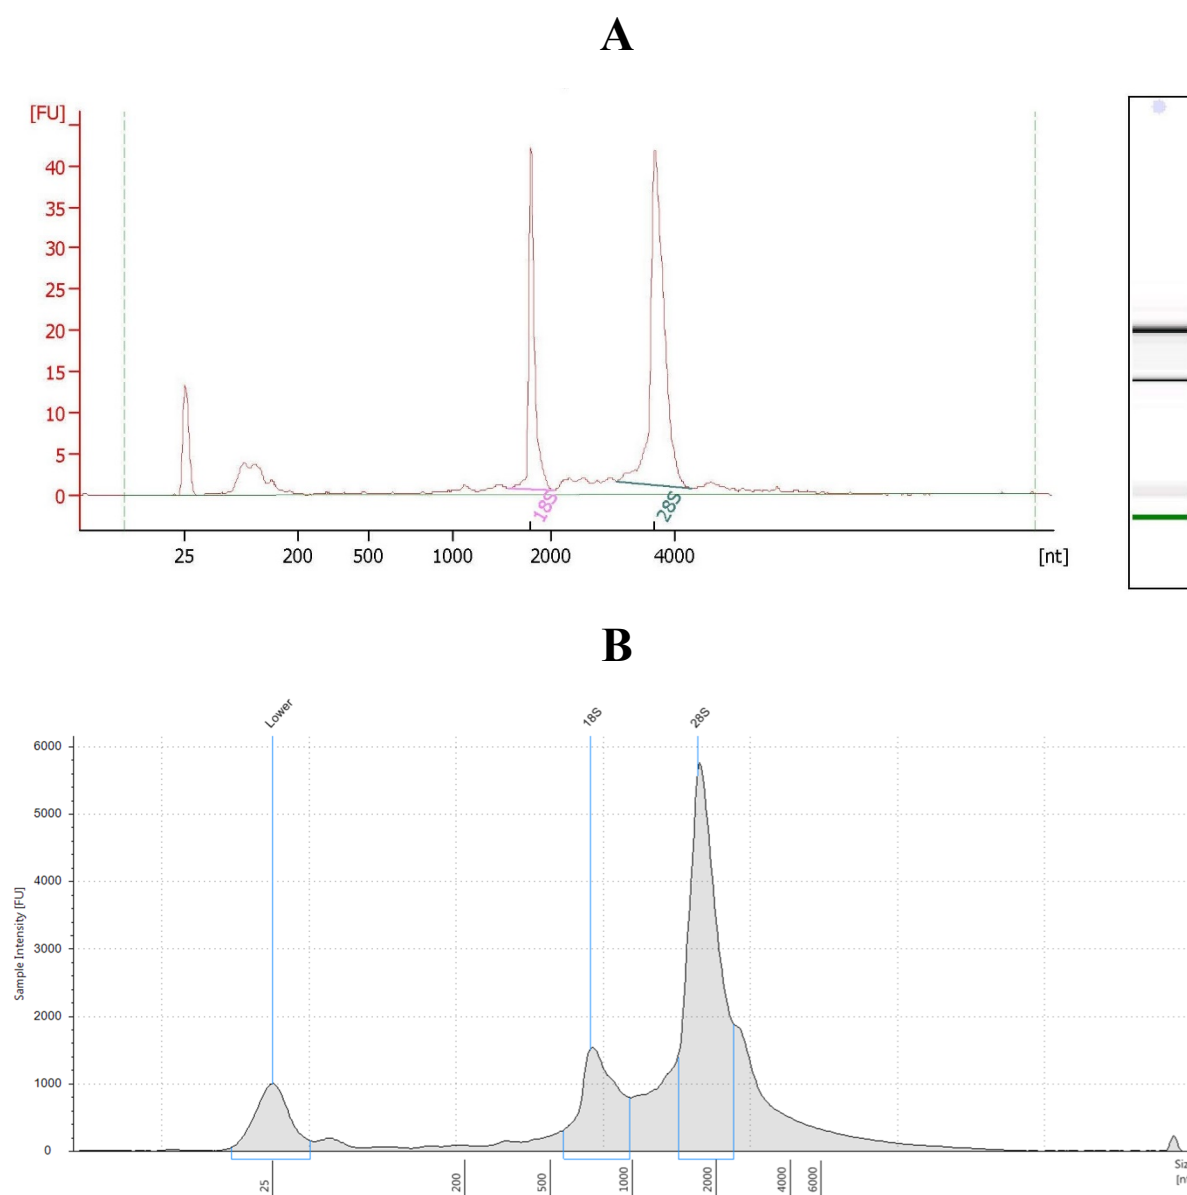

**Figure S2.** Examples of the electropherograms used to estimate the RIN in the samples used for RNAseq. The picture in panel (A) corresponds to the RNA of replicate 2 of the cells exposed to 40  $\mu\text{g/mL}$  of the CdSe-QDs obtained immediately after RNA isolation, and corresponds to a RIN of 9.8. The picture in panel (B) corresponds to the same sample analyzed by MACROGEN Inc. after being transported to South Korea and corresponds to an RIN of 8.2.

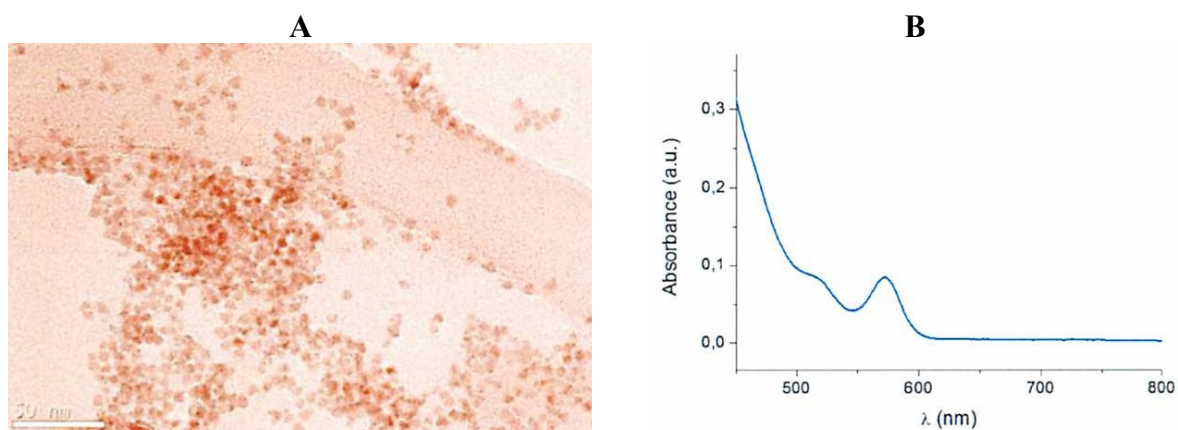

**Figure S3.** Preliminary physical characterization of the CdSe-QD NPs. TEM image (A) and the ultraviolet-visible absorption spectrum of the CdSe-QDs (B) used in this work. The company providing the NPs batch supplied the information.
