# Supplementary material for: A Transcriptomic Analysis of T98G Human Glioblastoma Cells after Exposure to Cadmium-Selenium Quantum Dots Mainly Reveals Alterations in Neuroinflammation Processes and Hypothalamus Regulation
Source: Int J Mol Sci. 2022 Feb 18;23(4):2267. doi: 10.3390/ijms23042267 (PMC8877384; doi:10.3390/ijms23042267)
Supplement: Supplementary file 1 [file ijms-23-02267-s001.zip › Table S1.xlsx]

## Sheet: DEG
Table S1. Differentially expressed genes. List of genes with an altered expression after being exposed for 72 hour to 40 µg/ml of CdSe-QDs. The FDR threshold was set at 5%. The green- and yellow-shadowed genes were used to identify altered molecular pathways.
test_id	gene	sample_1	sample_2	status	value_1	value_2	log2(fold_change)	test_stat	p_value	q_value	significant
ENSG00000273437	AC108673.3	control	QD	OK	0	1.31556	inf	-nan	5e-05	0.00254504	yes
ENSG00000274341	AC005899.6	control	QD	OK	0	1.96607	inf	-nan	0.00145	0.0359728	yes
ENSG00000114857	NKTR	control	QD	OK	0.153102	3.15773	4.36632	0.660646	5e-05	0.00254504	yes
ENSG00000115353	TACR1	control	QD	OK	0.300436	1.74161	2.5353	1.46894	5e-05	0.00254504	yes
ENSG00000134668	SPOCD1	control	QD	OK	0.859113	2.61693	1.60696	1.49134	0.0002	0.0080061	yes
ENSG00000125538	IL1B	control	QD	OK	0.523693	1.55737	1.57232	1.01676	0.00155	0.0377401	yes
ENSG00000021300	PLEKHB1	control	QD	OK	0.561936	1.56408	1.47684	0.613041	0.0003	0.0110709	yes
ENSG00000012124	CD22	control	QD	OK	3.22631	8.55168	1.40632	1.61338	5e-05	0.00254504	yes
ENSG00000198168	SVIP	control	QD	OK	1.98092	5.12141	1.37037	1.78971	0.00155	0.0377401	yes
ENSG00000166922	SCG5	control	QD	OK	8.07304	20.8377	1.36801	4.85122	5e-05	0.00254504	yes
ENSG00000205426	KRT81	control	QD	OK	50.5125	128.738	1.34973	7.70492	5e-05	0.00254504	yes
ENSG00000067798	NAV3	control	QD	OK	1.07401	2.72973	1.34575	1.07272	0.0006	0.0187942	yes
ENSG00000162745	OLFML2B	control	QD	OK	8.90019	21.8213	1.29383	5.31812	5e-05	0.00254504	yes
ENSG00000139364	TMEM132B	control	QD	OK	21.4009	51.5535	1.2684	2.70114	5e-05	0.00254504	yes
ENSG00000148950	IMMP1L	control	QD	OK	15.7211	36.3315	1.20852	3.68086	5e-05	0.00254504	yes
ENSG00000181031	RPH3AL	control	QD	OK	1.06087	2.38362	1.16791	0.729007	0.0007	0.0214153	yes
ENSG00000170442	KRT86	control	QD	OK	4.14474	9.13443	1.14004	1.82142	0.00135	0.0348844	yes
ENSG00000184254	ALDH1A3	control	QD	OK	3.8691	8.39709	1.11789	1.76838	0.002	0.0463098	yes
ENSG00000138376	BARD1	control	QD	OK	2.52562	5.47669	1.11667	1.71131	0.00145	0.0359728	yes
ENSG00000064886	CHI3L2	control	QD	OK	1.31845	2.84662	1.11041	0.838392	0.0022	0.0485604	yes
ENSG00000087116	ADAMTS2	control	QD	OK	2.9764	6.35857	1.09513	2.58555	5e-05	0.00254504	yes
ENSG00000149295	DRD2	control	QD	OK	3.34568	7.03534	1.07232	2.41025	5e-05	0.00254504	yes
ENSG00000168398	BDKRB2	control	QD	OK	0.773498	1.61391	1.06109	2.64956	5e-05	0.00254504	yes
ENSG00000198886	MT-ND4	control	QD	OK	1.54717	3.195	1.04618	2.45206	0.0004	0.0139751	yes
ENSG00000029153	ARNTL2	control	QD	OK	1.21298	2.50471	1.04609	1.49695	0.00095	0.0267108	yes
ENSG00000135898	GPR55	control	QD	OK	0.919537	1.89702	1.04475	2.04124	5e-05	0.00254504	yes
ENSG00000185567	AHNAK2	control	QD	OK	2.43308	4.98776	1.03561	2.80167	5e-05	0.00254504	yes
ENSG00000152782	PANK1	control	QD	OK	2.03302	4.1667	1.03528	2.07083	5e-05	0.00254504	yes
ENSG00000161048	NAPEPLD	control	QD	OK	1.40784	2.84549	1.01519	1.59195	0.0002	0.0080061	yes
ENSG00000186197	EDARADD	control	QD	OK	1.1808	2.38121	1.01193	1.71079	0.0014	0.0354777	yes
ENSG00000169715	MT1E	control	QD	OK	47.9946	96.3408	1.00527	4.2311	5e-05	0.00254504	yes
ENSG00000259753	AC068234.1	control	QD	OK	2.31857	4.63069	0.997992	2.9475	5e-05	0.00254504	yes
ENSG00000159307	SCUBE1	control	QD	OK	8.47894	16.9145	0.996305	1.98797	0.00025	0.00946234	yes
ENSG00000077984	CST7	control	QD	OK	7.04325	14.0174	0.992902	3.54575	5e-05	0.00254504	yes
ENSG00000125148	MT2A	control	QD	OK	339.384	665.661	0.971868	5.72395	5e-05	0.00254504	yes
ENSG00000184009	ACTG1	control	QD	OK	1219.82	2388.47	0.96941	4.74983	5e-05	0.00254504	yes
ENSG00000178573	MAF	control	QD	OK	2.67425	5.19062	0.956772	2.40227	5e-05	0.00254504	yes
ENSG00000137501	SYTL2	control	QD	OK	5.52172	10.6259	0.944399	1.91308	5e-05	0.00254504	yes
ENSG00000179240	AP002360.1	control	QD	OK	2.06701	3.96724	0.940587	1.63998	0.00125	0.0329492	yes
ENSG00000110400	NECTIN1	control	QD	OK	3.09215	5.90311	0.932865	2.52205	5e-05	0.00254504	yes
ENSG00000196126	HLA-DRB1	control	QD	OK	1.46971	2.80112	0.930478	1.97471	0.001	0.0277207	yes
ENSG00000162849	KIF26B	control	QD	OK	1.6702	3.13933	0.91044	3.3601	5e-05	0.00254504	yes
ENSG00000006534	ALDH3B1	control	QD	OK	20.2994	38.1349	0.909673	3.25226	5e-05	0.00254504	yes
ENSG00000136235	GPNMB	control	QD	OK	23.7055	44.3941	0.905149	4.53228	5e-05	0.00254504	yes
ENSG00000065328	MCM10	control	QD	OK	1.63259	3.04661	0.900048	1.34937	0.00165	0.0392049	yes
ENSG00000146411	SLC2A12	control	QD	OK	3.61584	6.64241	0.877377	3.30415	5e-05	0.00254504	yes
ENSG00000070269	TMEM260	control	QD	OK	1.96731	3.61277	0.876881	1.23372	0.0013	0.0339639	yes
ENSG00000092470	WDR76	control	QD	OK	3.12804	5.73554	0.874672	2.57685	5e-05	0.00254504	yes
ENSG00000138641	HERC3	control	QD	OK	10.7469	19.693	0.873759	1.86401	0.0001	0.00455946	yes
ENSG00000085276	MECOM	control	QD	OK	3.26077	5.9677	0.871964	1.67162	5e-05	0.00254504	yes
ENSG00000139278	GLIPR1	control	QD	OK	15.649	28.5858	0.869227	2.06063	0.00055	0.0175066	yes
ENSG00000163083	INHBB	control	QD	OK	2.17687	3.9601	0.863282	3.33591	5e-05	0.00254504	yes
ENSG00000185585	OLFML2A	control	QD	OK	2.56545	4.65193	0.858614	2.94353	5e-05	0.00254504	yes
ENSG00000103489	XYLT1	control	QD	OK	4.14724	7.45203	0.845481	3.55174	5e-05	0.00254504	yes
ENSG00000196549	MME	control	QD	OK	3.24204	5.81497	0.842869	1.62285	0.0002	0.0080061	yes
ENSG00000171246	NPTX1	control	QD	OK	27.4072	48.819	0.832886	4.45267	5e-05	0.00254504	yes
ENSG00000065534	MYLK	control	QD	OK	13.7807	24.2603	0.815952	2.11192	0.00025	0.00946234	yes
ENSG00000136842	TMOD1	control	QD	OK	2.8697	5.04989	0.815353	2.26889	0.00025	0.00946234	yes
ENSG00000170776	AKAP13	control	QD	OK	7.00714	12.268	0.808005	1.88924	5e-05	0.00254504	yes
ENSG00000223855	HRAT92	control	QD	OK	0.914399	1.60044	0.807576	2.3122	0.0002	0.0080061	yes
ENSG00000138944	KIAA1644	control	QD	OK	2.18095	3.79783	0.800217	3.73064	5e-05	0.00254504	yes
ENSG00000124813	RUNX2	control	QD	OK	12.2563	21.2108	0.791275	3.61782	5e-05	0.00254504	yes
ENSG00000105339	DENND3	control	QD	OK	5.3917	9.29539	0.785775	1.79822	0.0005	0.016356	yes
ENSG00000101871	MID1	control	QD	OK	7.21228	12.3559	0.776671	2.10107	0.0004	0.0139751	yes
ENSG00000135074	ADAM19	control	QD	OK	3.50798	6.00711	0.776029	3.45371	5e-05	0.00254504	yes
ENSG00000213190	MLLT11	control	QD	OK	10.7025	18.298	0.773735	2.68936	5e-05	0.00254504	yes
ENSG00000100302	RASD2	control	QD	OK	0.718399	1.21979	0.763771	1.91972	0.00155	0.0377401	yes
ENSG00000075461	CACNG4	control	QD	OK	2.25643	3.82837	0.762688	2.99617	5e-05	0.00254504	yes
ENSG00000134955	SLC37A2	control	QD	OK	3.57956	6.04809	0.756698	2.4546	0.0002	0.0080061	yes
ENSG00000106003	LFNG	control	QD	OK	2.8041	4.72593	0.753059	2.04095	5e-05	0.00254504	yes
ENSG00000023839	ABCC2	control	QD	OK	1.06113	1.78413	0.749617	1.61142	0.00095	0.0267108	yes
ENSG00000165449	SLC16A9	control	QD	OK	1.67641	2.80949	0.744933	1.93253	0.00035	0.0125628	yes
ENSG00000185352	HS6ST3	control	QD	OK	1.01006	1.6813	0.735143	2.83691	5e-05	0.00254504	yes
ENSG00000126001	CEP250	control	QD	OK	18.433	30.6525	0.733719	1.92102	0.0011	0.0297252	yes
ENSG00000103196	CRISPLD2	control	QD	OK	5.81338	9.65469	0.731852	2.96324	5e-05	0.00254504	yes
ENSG00000151917	BEND6	control	QD	OK	5.66208	9.3875	0.729408	2.01636	0.00125	0.0329492	yes
ENSG00000102781	KATNAL1	control	QD	OK	4.21924	6.98744	0.72778	1.77233	0.0011	0.0297252	yes
ENSG00000166250	CLMP	control	QD	OK	23.515	38.912	0.72663	2.76113	5e-05	0.00254504	yes
ENSG00000156298	TSPAN7	control	QD	OK	29.8358	49.3129	0.72492	2.83115	5e-05	0.00254504	yes
ENSG00000203999	LINC01270	control	QD	OK	2.03117	3.35416	0.72364	1.84221	0.00145	0.0359728	yes
ENSG00000130522	JUND	control	QD	OK	64.1043	105.248	0.715306	3.08786	5e-05	0.00254504	yes
ENSG00000115232	ITGA4	control	QD	OK	4.88462	7.97771	0.707728	2.2828	5e-05	0.00254504	yes
ENSG00000166106	ADAMTS15	control	QD	OK	1.19793	1.95072	0.703464	2.67394	5e-05	0.00254504	yes
ENSG00000221955	SLC12A8	control	QD	OK	43.4812	70.648	0.700257	3.50794	5e-05	0.00254504	yes
ENSG00000075391	RASAL2	control	QD	OK	2.96757	4.8043	0.695042	1.77785	0.00205	0.0469156	yes
ENSG00000164742	ADCY1	control	QD	OK	1.78228	2.87832	0.691501	1.7592	0.0008	0.0237965	yes
ENSG00000149218	ENDOD1	control	QD	OK	3.91321	6.31808	0.691133	3.35677	5e-05	0.00254504	yes
ENSG00000196923	PDLIM7	control	QD	OK	33.7744	54.4238	0.688306	3.21615	5e-05	0.00254504	yes
ENSG00000109586	GALNT7	control	QD	OK	24.7519	39.7567	0.683662	2.05031	0.00135	0.0348844	yes
ENSG00000133048	CHI3L1	control	QD	OK	5.81345	9.33486	0.683234	2.15569	0.0003	0.0110709	yes
ENSG00000185090	MANEAL	control	QD	OK	4.5004	7.22342	0.682627	2.67866	5e-05	0.00254504	yes
ENSG00000169991	IFFO2	control	QD	OK	3.74299	5.99956	0.680666	1.74474	0.00195	0.0454192	yes
ENSG00000225614	ZNF469	control	QD	OK	4.04953	6.46843	0.675663	3.92651	5e-05	0.00254504	yes
ENSG00000124225	PMEPA1	control	QD	OK	12.7097	20.2746	0.673743	1.87229	0.00125	0.0329492	yes
ENSG00000154027	AK5	control	QD	OK	22.4001	35.6002	0.66838	2.00015	0.0005	0.016356	yes
ENSG00000109971	HSPA8	control	QD	OK	755.441	1188.92	0.654256	3.31612	5e-05	0.00254504	yes
ENSG00000164176	EDIL3	control	QD	OK	8.97336	14.1223	0.654255	2.82701	5e-05	0.00254504	yes
ENSG00000102796	DHRS12	control	QD	OK	6.11182	9.59326	0.65042	1.60352	0.0023	0.0499278	yes
ENSG00000019582	CD74	control	QD	OK	5.63528	8.81769	0.645914	1.88629	5e-05	0.00254504	yes
ENSG00000144152	FBLN7	control	QD	OK	4.51943	7.04417	0.64029	1.89491	0.0009	0.0258591	yes
ENSG00000148680	HTR7	control	QD	OK	1.32487	2.06043	0.637095	1.87013	0.00095	0.0267108	yes
ENSG00000196754	S100A2	control	QD	OK	14.9685	23.2413	0.63476	1.87553	0.0008	0.0237965	yes
ENSG00000129116	PALLD	control	QD	OK	36.3006	56.208	0.630785	3.04779	5e-05	0.00254504	yes
ENSG00000140682	TGFB1I1	control	QD	OK	39.4998	60.7871	0.621921	2.29397	0.00035	0.0125628	yes
ENSG00000089351	GRAMD1A	control	QD	OK	21.3549	32.7215	0.615673	1.89572	0.00035	0.0125628	yes
ENSG00000090975	PITPNM2	control	QD	OK	6.12153	9.35932	0.612511	2.40727	5e-05	0.00254504	yes
ENSG00000178035	IMPDH2	control	QD	OK	95.3371	145.36	0.608525	3.60451	5e-05	0.00254504	yes
ENSG00000134909	ARHGAP32	control	QD	OK	6.57974	10.022	0.607071	1.6981	0.00215	0.0479044	yes
ENSG00000138678	GPAT3	control	QD	OK	29.9593	45.5466	0.604339	3.027	5e-05	0.00254504	yes
ENSG00000078018	MAP2	control	QD	OK	19.2133	29.1692	0.602343	2.63149	5e-05	0.00254504	yes
ENSG00000170456	DENND5B	control	QD	OK	3.45987	5.25259	0.602313	1.75525	0.0003	0.0110709	yes
ENSG00000152953	STK32B	control	QD	OK	5.70107	8.61408	0.595465	2.42564	5e-05	0.00254504	yes
ENSG00000103811	CTSH	control	QD	OK	34.7997	52.5043	0.593362	2.70443	5e-05	0.00254504	yes
ENSG00000073536	NLE1	control	QD	OK	14.9313	22.5113	0.592307	2.34148	5e-05	0.00254504	yes
ENSG00000168077	SCARA3	control	QD	OK	5.06026	7.60666	0.588051	2.63698	5e-05	0.00254504	yes
ENSG00000067177	PHKA1	control	QD	OK	1.79883	2.70363	0.587834	2.30079	0.0001	0.00455946	yes
ENSG00000075624	ACTB	control	QD	OK	1904.62	2859.13	0.586071	3.58686	5e-05	0.00254504	yes
ENSG00000115648	MLPH	control	QD	OK	42.1709	63.2374	0.58453	2.67426	5e-05	0.00254504	yes
ENSG00000058056	USP13	control	QD	OK	3.59249	5.34718	0.573795	1.82008	0.0005	0.016356	yes
ENSG00000156535	CD109	control	QD	OK	6.18842	9.20699	0.573159	2.33613	5e-05	0.00254504	yes
ENSG00000132846	ZBED3	control	QD	OK	2.24461	3.33833	0.572664	1.49511	0.00215	0.0479044	yes
ENSG00000175455	CCDC14	control	QD	OK	30.6468	45.5409	0.571427	1.83863	0.00115	0.0309347	yes
ENSG00000144354	CDCA7	control	QD	OK	16.573	24.6201	0.571007	2.94422	5e-05	0.00254504	yes
ENSG00000129514	FOXA1	control	QD	OK	5.71736	8.48216	0.569083	1.88578	0.0006	0.0187942	yes
ENSG00000162636	FAM102B	control	QD	OK	1.16472	1.7274	0.568619	1.94409	0.0002	0.0080061	yes
ENSG00000120885	CLU	control	QD	OK	294.355	436.192	0.567406	2.16266	0.00015	0.00637176	yes
ENSG00000129353	SLC44A2	control	QD	OK	26.5265	39.285	0.566546	2.49219	5e-05	0.00254504	yes
ENSG00000011638	TMEM159	control	QD	OK	10.9124	16.1416	0.56481	1.79412	0.00125	0.0329492	yes
ENSG00000124787	RPP40	control	QD	OK	17.5563	25.7606	0.553181	2.39115	0.0001	0.00455946	yes
ENSG00000145012	LPP	control	QD	OK	6.76368	9.91139	0.55128	1.21008	0.0007	0.0214153	yes
ENSG00000119408	NEK6	control	QD	OK	27.9942	41.0044	0.550648	2.39697	5e-05	0.00254504	yes
ENSG00000168297	PXK	control	QD	OK	36.2023	52.9467	0.548458	3.03027	5e-05	0.00254504	yes
ENSG00000158258	CLSTN2	control	QD	OK	29.3721	42.953	0.548309	3.45246	5e-05	0.00254504	yes
ENSG00000146122	DAAM2	control	QD	OK	4.45953	6.51233	0.546285	1.87408	5e-05	0.00254504	yes
ENSG00000137460	FHDC1	control	QD	OK	1.45134	2.11932	0.546222	2.19825	0.00015	0.00637176	yes
ENSG00000110880	CORO1C	control	QD	OK	37.3538	54.5228	0.545605	2.69788	5e-05	0.00254504	yes
ENSG00000039560	RAI14	control	QD	OK	16.0962	23.3941	0.539424	1.73515	0.00025	0.00946234	yes
ENSG00000184831	APOO	control	QD	OK	15.2333	22.1383	0.539311	1.66565	0.00175	0.041085	yes
ENSG00000171793	CTPS1	control	QD	OK	44.3408	64.0748	0.531122	1.94996	0.0005	0.016356	yes
ENSG00000106366	SERPINE1	control	QD	OK	1.92824	2.78597	0.530896	1.90405	0.00165	0.0392049	yes
ENSG00000100234	TIMP3	control	QD	OK	803.501	1159.32	0.528912	3.24972	5e-05	0.00254504	yes
ENSG00000164951	PDP1	control	QD	OK	28.0842	40.4323	0.525749	2.52216	5e-05	0.00254504	yes
ENSG00000134871	COL4A2	control	QD	OK	35.5603	50.9315	0.518291	2.36104	5e-05	0.00254504	yes
ENSG00000096060	FKBP5	control	QD	OK	6.94195	9.91665	0.514513	2.655	5e-05	0.00254504	yes
ENSG00000137309	HMGA1	control	QD	OK	98.1816	140.075	0.51267	3.21905	5e-05	0.00254504	yes
ENSG00000085840	ORC1	control	QD	OK	2.81151	4.01071	0.512511	2.02538	0.0002	0.0080061	yes
ENSG00000176595	KBTBD11	control	QD	OK	1.73873	2.47089	0.507	2.16927	0.00025	0.00946234	yes
ENSG00000157613	CREB3L1	control	QD	OK	7.67764	10.9059	0.506371	1.67722	0.0016	0.0384815	yes
ENSG00000123416	TUBA1B	control	QD	OK	15.4106	21.8831	0.505894	2.30766	5e-05	0.00254504	yes
ENSG00000183770	FOXL2	control	QD	OK	2.60059	3.68135	0.501396	1.91817	0.0009	0.0258591	yes
ENSG00000221886	ZBED8	control	QD	OK	3.46901	4.89899	0.497959	1.99909	0.0005	0.016356	yes
ENSG00000105928	GSDME	control	QD	OK	35.6367	50.3231	0.497858	2.48682	5e-05	0.00254504	yes
ENSG00000175602	CCDC85B	control	QD	OK	34.3468	48.4999	0.497806	2.82716	5e-05	0.00254504	yes
ENSG00000151458	ANKRD50	control	QD	OK	4.09244	5.77018	0.495656	2.38124	5e-05	0.00254504	yes
ENSG00000052126	PLEKHA5	control	QD	OK	7.44873	10.4909	0.494075	1.72402	0.001	0.0277207	yes
ENSG00000227471	AKR1B15	control	QD	OK	14.1561	19.9116	0.492186	2.34548	0.0001	0.00455946	yes
ENSG00000137267	TUBB2A	control	QD	OK	7.1544	10.0598	0.491696	1.89618	0.0014	0.0354777	yes
ENSG00000135919	SERPINE2	control	QD	OK	103.222	145.017	0.490475	2.86663	5e-05	0.00254504	yes
ENSG00000243137	PSG4	control	QD	OK	19.3123	27.0751	0.487447	1.82494	0.00095	0.0267108	yes
ENSG00000159840	ZYX	control	QD	OK	81.7068	114.395	0.485494	2.88379	5e-05	0.00254504	yes
ENSG00000205403	CFI	control	QD	OK	4.45973	6.23888	0.484331	1.69414	0.002	0.0463098	yes
ENSG00000176903	PNMA1	control	QD	OK	17.9415	25.0708	0.482712	2.7153	5e-05	0.00254504	yes
ENSG00000179262	RAD23A	control	QD	OK	63.3047	88.356	0.481016	2.18049	0.00025	0.00946234	yes
ENSG00000198467	TPM2	control	QD	OK	202.269	282.052	0.479685	2.77198	5e-05	0.00254504	yes
ENSG00000112624	BICRAL	control	QD	OK	2.96328	4.12211	0.476189	2.32921	0.0001	0.00455946	yes
ENSG00000151835	SACS	control	QD	OK	4.76191	6.61833	0.474925	2.20444	0.00015	0.00637176	yes
ENSG00000101224	CDC25B	control	QD	OK	103.861	144.036	0.471779	2.18332	0.0001	0.00455946	yes
ENSG00000166949	SMAD3	control	QD	OK	51.8865	71.8732	0.470094	1.89207	0.00225	0.0492042	yes
ENSG00000170382	LRRN2	control	QD	OK	9.03748	12.5066	0.468692	1.81688	0.00225	0.0492042	yes
ENSG00000139211	AMIGO2	control	QD	OK	23.3668	32.2459	0.464653	2.65175	5e-05	0.00254504	yes
ENSG00000170871	KIAA0232	control	QD	OK	9.15685	12.6324	0.464202	1.91132	0.00035	0.0125628	yes
ENSG00000110080	ST3GAL4	control	QD	OK	29.1197	40.0389	0.459406	2.24937	0.0001	0.00455946	yes
ENSG00000187244	BCAM	control	QD	OK	18.9591	26.0202	0.45674	2.12905	0.0002	0.0080061	yes
ENSG00000164983	TMEM65	control	QD	OK	4.80918	6.59803	0.456243	2.56021	5e-05	0.00254504	yes
ENSG00000011426	ANLN	control	QD	OK	18.8145	25.7686	0.453764	1.77722	0.0011	0.0297252	yes
ENSG00000125534	PPDPF	control	QD	OK	296.335	405.82	0.45361	2.71249	5e-05	0.00254504	yes
ENSG00000129422	MTUS1	control	QD	OK	20.1603	27.5279	0.449375	1.8205	0.0005	0.016356	yes
ENSG00000172819	RARG	control	QD	OK	22.7795	31.0904	0.448737	2.13473	0.0001	0.00455946	yes
ENSG00000077713	SLC25A43	control	QD	OK	12.4455	16.9631	0.446772	2.00381	0.00025	0.00946234	yes
ENSG00000085719	CPNE3	control	QD	OK	19.931	27.1625	0.446606	1.95113	0.00095	0.0267108	yes
ENSG00000112759	SLC29A1	control	QD	OK	14.9276	20.2804	0.442098	2.22654	5e-05	0.00254504	yes
ENSG00000052850	ALX4	control	QD	OK	5.33439	7.23807	0.440281	2.3356	5e-05	0.00254504	yes
ENSG00000109089	CDR2L	control	QD	OK	11.4497	15.514	0.43826	2.42178	5e-05	0.00254504	yes
ENSG00000104332	SFRP1	control	QD	OK	7.15382	9.63589	0.429704	2.2042	0.0002	0.0080061	yes
ENSG00000111144	LTA4H	control	QD	OK	20.8818	28.0875	0.427682	2.19226	0.00025	0.00946234	yes
ENSG00000058668	ATP2B4	control	QD	OK	12.0449	16.1976	0.427363	1.64959	0.00175	0.041085	yes
ENSG00000112118	MCM3	control	QD	OK	26.3761	35.4141	0.425093	2.19737	0.0001	0.00455946	yes
ENSG00000173698	ADGRG2	control	QD	OK	2.5078	3.35282	0.418955	1.74638	0.00205	0.0469156	yes
ENSG00000101210	EEF1A2	control	QD	OK	38.5151	51.4202	0.41691	2.42034	5e-05	0.00254504	yes
ENSG00000100580	TMED8	control	QD	OK	1.94331	2.59234	0.415741	1.8482	0.0015	0.0369031	yes
ENSG00000167658	EEF2	control	QD	OK	802.861	1069.56	0.413793	2.55214	5e-05	0.00254504	yes
ENSG00000237807	AC022034.2	control	QD	OK	5.81488	7.7409	0.41275	1.81985	0.00145	0.0359728	yes
ENSG00000158270	COLEC12	control	QD	OK	40.2996	53.6111	0.411766	2.55835	5e-05	0.00254504	yes
ENSG00000114573	ATP6V1A	control	QD	OK	32.2539	42.8894	0.411148	2.47813	5e-05	0.00254504	yes
ENSG00000196230	TUBB	control	QD	OK	490.8	652.191	0.410158	2.63082	5e-05	0.00254504	yes
ENSG00000180198	RCC1	control	QD	OK	18.148	24.1078	0.409693	1.86464	0.0011	0.0297252	yes
ENSG00000086015	MAST2	control	QD	OK	37.3058	49.3926	0.404895	1.63537	0.00085	0.0248457	yes
ENSG00000187325	TAF9B	control	QD	OK	6.50816	8.61076	0.40389	1.83733	0.00085	0.0248457	yes
ENSG00000181588	MEX3D	control	QD	OK	11.0226	14.5828	0.403811	1.83416	0.0023	0.0499278	yes
ENSG00000158158	CNNM4	control	QD	OK	5.10465	6.74622	0.402267	1.64037	0.00185	0.0431752	yes
ENSG00000122778	KIAA1549	control	QD	OK	7.58208	10.0162	0.401676	2.12449	0.0003	0.0110709	yes
ENSG00000179456	ZBTB18	control	QD	OK	8.5936	11.3503	0.40139	2.13935	0.00015	0.00637176	yes
ENSG00000156976	EIF4A2	control	QD	OK	184.1	242.02	0.394639	1.97726	0.001	0.0277207	yes
ENSG00000089057	SLC23A2	control	QD	OK	21.672	28.49	0.394624	2.37398	5e-05	0.00254504	yes
ENSG00000063660	GPC1	control	QD	OK	108.567	142.453	0.391904	2.03463	0.00035	0.0125628	yes
ENSG00000012171	SEMA3B	control	QD	OK	23.8736	31.3174	0.391545	1.9157	0.00085	0.0248457	yes
ENSG00000171700	RGS19	control	QD	OK	15.2029	19.9284	0.390485	1.80767	0.0014	0.0354777	yes
ENSG00000167460	TPM4	control	QD	OK	264.763	346.892	0.389785	1.84847	0.0008	0.0237965	yes
ENSG00000005022	SLC25A5	control	QD	OK	219.789	287.426	0.387071	2.38904	0.0001	0.00455946	yes
ENSG00000076864	RAP1GAP	control	QD	OK	8.41657	11.0029	0.386584	1.57575	0.00175	0.041085	yes
ENSG00000271303	SRXN1	control	QD	OK	297.591	388.401	0.384217	2.48707	5e-05	0.00254504	yes
ENSG00000187189	TSPYL4	control	QD	OK	4.57513	5.9444	0.377717	1.81479	0.00145	0.0359728	yes
ENSG00000136111	TBC1D4	control	QD	OK	11.1892	14.5374	0.37766	1.77909	0.0014	0.0354777	yes
ENSG00000188042	ARL4C	control	QD	OK	8.73095	11.3087	0.373227	1.97462	0.00075	0.0226515	yes
ENSG00000136854	STXBP1	control	QD	OK	19.8952	25.7407	0.371627	1.56232	0.00205	0.0469156	yes
ENSG00000106789	CORO2A	control	QD	OK	6.83521	8.83663	0.370511	2.01613	0.0004	0.0139751	yes
ENSG00000101190	TCFL5	control	QD	OK	9.64142	12.4512	0.368967	1.8014	0.0021	0.047236	yes
ENSG00000158470	B4GALT5	control	QD	OK	28.7976	36.9569	0.359896	2.23399	0.00015	0.00637176	yes
ENSG00000130147	SH3BP4	control	QD	OK	23.5537	30.1982	0.358511	1.80488	0.0004	0.0139751	yes
ENSG00000134250	NOTCH2	control	QD	OK	13.8713	17.7806	0.358196	1.80576	0.0001	0.00455946	yes
ENSG00000101444	AHCY	control	QD	OK	56.9363	72.9392	0.357346	2.03476	0.0005	0.016356	yes
ENSG00000143067	ZNF697	control	QD	OK	4.17267	5.34186	0.35637	1.74472	0.0021	0.047236	yes
ENSG00000240184	PCDHGC3	control	QD	OK	130.164	166.61	0.356147	1.79692	0.00165	0.0392049	yes
ENSG00000102034	ELF4	control	QD	OK	15.8476	20.2701	0.355084	1.92722	0.0005	0.016356	yes
ENSG00000110092	CCND1	control	QD	OK	33.8001	43.2184	0.354616	1.79409	0.0011	0.0297252	yes
ENSG00000143369	ECM1	control	QD	OK	30.4317	38.9103	0.35458	2.01159	0.00075	0.0226515	yes
ENSG00000071127	WDR1	control	QD	OK	97.9918	125.116	0.352531	1.79838	0.00205	0.0469156	yes
ENSG00000127418	FGFRL1	control	QD	OK	21.9837	28.0498	0.351558	1.88609	0.00055	0.0175066	yes
ENSG00000135052	GOLM1	control	QD	OK	21.0714	26.8833	0.351425	1.90774	0.00045	0.015403	yes
ENSG00000182871	COL18A1	control	QD	OK	81.7838	104.247	0.350123	1.79422	0.00085	0.0248457	yes
ENSG00000035862	TIMP2	control	QD	OK	109.614	139.537	0.348221	2.21484	0.00015	0.00637176	yes
ENSG00000064419	TNPO3	control	QD	OK	27.6282	35.1457	0.347206	2.12464	0.00045	0.015403	yes
ENSG00000205339	IPO7	control	QD	OK	33.8413	42.9555	0.344057	1.72011	0.00055	0.0175066	yes
ENSG00000100345	MYH9	control	QD	OK	162.221	205.657	0.342281	1.807	0.0002	0.0080061	yes
ENSG00000196352	CD55	control	QD	OK	33.759	42.7517	0.34071	1.86415	0.0012	0.0320606	yes
ENSG00000165802	NSMF	control	QD	OK	83.3604	105.555	0.340567	1.91919	0.0007	0.0214153	yes
ENSG00000139722	VPS37B	control	QD	OK	16.5799	20.9846	0.339895	1.90398	0.00095	0.0267108	yes
ENSG00000160293	VAV2	control	QD	OK	8.5933	10.8547	0.337034	1.69451	0.00165	0.0392049	yes
ENSG00000116704	SLC35D1	control	QD	OK	6.02973	7.61338	0.336443	1.83241	0.0009	0.0258591	yes
ENSG00000010278	CD9	control	QD	OK	69.6907	87.8008	0.333267	1.86611	0.0014	0.0354777	yes
ENSG00000103257	SLC7A5	control	QD	OK	276.801	348.54	0.332475	2.13852	0.00025	0.00946234	yes
ENSG00000106853	PTGR1	control	QD	OK	425.598	535.892	0.332451	2.08989	0.0002	0.0080061	yes
ENSG00000143162	CREG1	control	QD	OK	71.6325	89.8943	0.327614	2.0274	0.00025	0.00946234	yes
ENSG00000138119	MYOF	control	QD	OK	69.1153	86.6698	0.326523	1.61786	0.0014	0.0354777	yes
ENSG00000050405	LIMA1	control	QD	OK	41.0775	51.5003	0.32623	1.79951	0.00145	0.0359728	yes
ENSG00000167552	TUBA1A	control	QD	OK	211.69	265.239	0.325343	2.01961	0.0001	0.00455946	yes
ENSG00000105953	OGDH	control	QD	OK	48.1854	60.3434	0.3246	1.86694	0.0013	0.0339639	yes
ENSG00000175130	MARCKSL1	control	QD	OK	32.0626	40.0996	0.322694	1.83303	0.00145	0.0359728	yes
ENSG00000160211	G6PD	control	QD	OK	587.686	733.373	0.319503	1.7531	0.0014	0.0354777	yes
ENSG00000131711	MAP1B	control	QD	OK	32.5939	40.3868	0.309282	1.93582	0.00045	0.015403	yes
ENSG00000136193	SCRN1	control	QD	OK	41.2502	51.0489	0.307479	1.66085	0.00155	0.0377401	yes
ENSG00000065150	IPO5	control	QD	OK	51.7948	63.9065	0.303155	1.57944	0.0017	0.0402311	yes
ENSG00000169100	SLC25A6	control	QD	OK	338.705	415.795	0.295842	1.83345	0.00105	0.028769	yes
ENSG00000092841	MYL6	control	QD	OK	798.943	977.29	0.290695	1.78447	0.00155	0.0377401	yes
ENSG00000080824	HSP90AA1	control	QD	OK	155.749	189.909	0.286086	1.77128	0.0018	0.042175	yes
ENSG00000137161	CNPY3	control	QD	OK	70.5011	57.7695	-0.287337	-1.72997	0.00215	0.0479044	yes
ENSG00000213699	SLC35F6	control	QD	OK	50.4936	41.2988	-0.290003	-1.68913	0.00205	0.0469156	yes
ENSG00000143106	PSMA5	control	QD	OK	129.372	105.327	-0.296642	-1.66378	0.0022	0.0485604	yes
ENSG00000231925	TAPBP	control	QD	OK	89.9155	72.9401	-0.301857	-1.83295	0.0008	0.0237965	yes
ENSG00000148248	SURF4	control	QD	OK	184.956	149.699	-0.305116	-1.91673	0.00095	0.0267108	yes
ENSG00000138069	RAB1A	control	QD	OK	142.251	114.716	-0.310369	-1.76332	0.0021	0.047236	yes
ENSG00000183291	SELENOF	control	QD	OK	272.507	218.815	-0.316582	-1.89635	0.00145	0.0359728	yes
ENSG00000141959	PFKL	control	QD	OK	117.605	94.1831	-0.320406	-1.89013	0.0012	0.0320606	yes
ENSG00000198833	UBE2J1	control	QD	OK	22.5026	18.0181	-0.320643	-1.90711	0.001	0.0277207	yes
ENSG00000143384	MCL1	control	QD	OK	67.9009	54.3545	-0.32103	-1.86439	0.00125	0.0329492	yes
ENSG00000155304	HSPA13	control	QD	OK	37.977	30.3314	-0.324318	-1.98666	0.0002	0.0080061	yes
ENSG00000052802	MSMO1	control	QD	OK	169.644	135.383	-0.325456	-2.00672	0.00075	0.0226515	yes
ENSG00000126088	UROD	control	QD	OK	179.4	143.122	-0.325928	-1.7927	0.00175	0.041085	yes
ENSG00000088298	EDEM2	control	QD	OK	45.2073	35.9939	-0.328806	-1.92618	0.00095	0.0267108	yes
ENSG00000124107	SLPI	control	QD	OK	431.167	342.672	-0.331418	-2.065	0.00045	0.015403	yes
ENSG00000133872	SARAF	control	QD	OK	284.589	226.14	-0.33166	-1.98426	0.00085	0.0248457	yes
ENSG00000244509	APOBEC3C	control	QD	OK	42.9768	34.0754	-0.334825	-1.75219	0.00225	0.0492042	yes
ENSG00000164761	TNFRSF11B	control	QD	OK	609.543	483.182	-0.335163	-1.79287	0.00225	0.0492042	yes
ENSG00000140941	MAP1LC3B	control	QD	OK	91.1583	72.2387	-0.335602	-1.85941	0.0012	0.0320606	yes
ENSG00000161179	YDJC	control	QD	OK	34.5901	27.4075	-0.335787	-1.79501	0.00165	0.0392049	yes
ENSG00000165030	NFIL3	control	QD	OK	41.993	33.1982	-0.339046	-1.98671	0.0008	0.0237965	yes
ENSG00000173486	FKBP2	control	QD	OK	331.508	261.65	-0.341406	-2.08576	0.0003	0.0110709	yes
ENSG00000168374	ARF4	control	QD	OK	252.232	198.743	-0.343849	-2.17121	5e-05	0.00254504	yes
ENSG00000116863	ADPRHL2	control	QD	OK	30.8704	24.3136	-0.344462	-1.87444	0.0014	0.0354777	yes
ENSG00000137868	STRA6	control	QD	OK	100.214	78.5492	-0.351412	-1.71765	0.00215	0.0479044	yes
ENSG00000088826	SMOX	control	QD	OK	41.7486	32.6669	-0.353898	-1.64159	0.00165	0.0392049	yes
ENSG00000239264	TXNDC5	control	QD	OK	285.638	223.391	-0.354615	-2.204	5e-05	0.00254504	yes
ENSG00000134333	LDHA	control	QD	OK	1974.19	1543.72	-0.354851	-1.85729	0.00135	0.0348844	yes
ENSG00000176171	BNIP3	control	QD	OK	114.64	89.6352	-0.354975	-1.7801	0.0016	0.0384815	yes
ENSG00000211445	GPX3	control	QD	OK	29.5891	23.1338	-0.355062	-1.76177	0.00185	0.0431752	yes
ENSG00000143774	GUK1	control	QD	OK	251.319	196.376	-0.355901	-1.97049	0.0005	0.016356	yes
ENSG00000244038	DDOST	control	QD	OK	395.962	309.273	-0.356478	-2.22432	0.0001	0.00455946	yes
ENSG00000106803	SEC61B	control	QD	OK	325.476	254.089	-0.357215	-2.16888	0.0001	0.00455946	yes
ENSG00000163479	SSR2	control	QD	OK	559.172	436.029	-0.358867	-2.28231	0.00015	0.00637176	yes
ENSG00000168894	RNF181	control	QD	OK	211.337	164.575	-0.360793	-2.09673	0.00025	0.00946234	yes
ENSG00000116285	ERRFI1	control	QD	OK	114.035	88.7695	-0.361345	-2.20043	0.0002	0.0080061	yes
ENSG00000109501	WFS1	control	QD	OK	33.7405	26.2637	-0.36141	-1.78519	0.00205	0.0469156	yes
ENSG00000132952	USPL1	control	QD	OK	9.51342	7.40486	-0.361491	-1.79633	0.00145	0.0359728	yes
ENSG00000255874	LINC00346	control	QD	OK	5.61281	4.36491	-0.362771	-1.87686	0.0013	0.0339639	yes
ENSG00000268205	AC005261.2	control	QD	OK	7.83877	6.087	-0.364896	-1.85912	0.0014	0.0354777	yes
ENSG00000074800	ENO1	control	QD	OK	2511.16	1947.12	-0.367012	-2.26936	5e-05	0.00254504	yes
ENSG00000138073	PREB	control	QD	OK	57.3679	44.4783	-0.367142	-1.98902	0.00045	0.015403	yes
ENSG00000101347	SAMHD1	control	QD	OK	12.789	9.90354	-0.368883	-2.02769	0.0002	0.0080061	yes
ENSG00000122861	PLAU	control	QD	OK	54.2748	42.029	-0.368897	-2.17742	0.0001	0.00455946	yes
ENSG00000095380	NANS	control	QD	OK	117.63	91.0093	-0.370165	-1.95494	0.00065	0.0201996	yes
ENSG00000112473	SLC39A7	control	QD	OK	247.694	191.126	-0.374036	-2.17568	0.00035	0.0125628	yes
ENSG00000027697	IFNGR1	control	QD	OK	49.8443	38.4537	-0.374308	-2.18072	0.00015	0.00637176	yes
ENSG00000088356	PDRG1	control	QD	OK	20.0932	15.4877	-0.375587	-1.95097	0.0009	0.0258591	yes
ENSG00000184840	TMED9	control	QD	OK	542.415	417.648	-0.37711	-2.35838	0.0001	0.00455946	yes
ENSG00000058799	YIPF1	control	QD	OK	28.4614	21.9119	-0.37729	-1.87708	0.00105	0.028769	yes
ENSG00000107223	EDF1	control	QD	OK	433.87	333.876	-0.377952	-2.34575	5e-05	0.00254504	yes
ENSG00000153989	NUS1	control	QD	OK	25.8044	19.8243	-0.380352	-2.30165	0.0001	0.00455946	yes
ENSG00000169976	SF3B5	control	QD	OK	148.663	113.961	-0.383512	-2.22428	5e-05	0.00254504	yes
ENSG00000108829	LRRC59	control	QD	OK	160.527	122.998	-0.384181	-2.43198	5e-05	0.00254504	yes
ENSG00000120875	DUSP4	control	QD	OK	34.6903	26.563	-0.385116	-2.38392	5e-05	0.00254504	yes
ENSG00000197043	ANXA6	control	QD	OK	273.315	209.225	-0.385511	-2.28445	5e-05	0.00254504	yes
ENSG00000136868	SLC31A1	control	QD	OK	32.8742	25.16	-0.385819	-1.94811	0.00055	0.0175066	yes
ENSG00000185950	IRS2	control	QD	OK	8.94976	6.84744	-0.386284	-2.22944	5e-05	0.00254504	yes
ENSG00000044574	HSPA5	control	QD	OK	2619.16	2002.56	-0.387257	-2.27265	0.0001	0.00455946	yes
ENSG00000196517	SLC6A9	control	QD	OK	94.4036	72.0436	-0.389972	-1.82523	0.0013	0.0339639	yes
ENSG00000167004	PDIA3	control	QD	OK	1513.6	1154.61	-0.390582	-2.01553	0.0005	0.016356	yes
ENSG00000123130	ACOT9	control	QD	OK	43.7493	33.351	-0.391528	-1.85966	0.0015	0.0369031	yes
ENSG00000111057	KRT18	control	QD	OK	124.672	94.9887	-0.392306	-2.1534	0.00015	0.00637176	yes
ENSG00000104635	SLC39A14	control	QD	OK	91.0017	69.2199	-0.394708	-2.38941	5e-05	0.00254504	yes
ENSG00000146674	IGFBP3	control	QD	OK	251.859	191.398	-0.396042	-2.4402	5e-05	0.00254504	yes
ENSG00000143870	PDIA6	control	QD	OK	649.275	492.213	-0.399548	-2.57056	5e-05	0.00254504	yes
ENSG00000087074	PPP1R15A	control	QD	OK	116.675	88.4138	-0.400151	-2.52123	5e-05	0.00254504	yes
ENSG00000183172	SMDT1	control	QD	OK	65.914	49.8956	-0.401673	-1.85078	0.0021	0.047236	yes
ENSG00000181830	SLC35C1	control	QD	OK	31.5082	23.8478	-0.401876	-1.95048	0.0005	0.016356	yes
ENSG00000167797	CDK2AP2	control	QD	OK	191.814	145.159	-0.402074	-2.35231	5e-05	0.00254504	yes
ENSG00000063241	ISOC2	control	QD	OK	154.84	117.175	-0.402116	-2.3958	5e-05	0.00254504	yes
ENSG00000153132	CLGN	control	QD	OK	23.1432	17.504	-0.402909	-2.2622	0.00015	0.00637176	yes
ENSG00000182944	EWSR1	control	QD	OK	203.798	154.119	-0.403098	-2.3837	5e-05	0.00254504	yes
ENSG00000150961	SEC24D	control	QD	OK	70.7564	53.4986	-0.40336	-2.21305	5e-05	0.00254504	yes
ENSG00000163902	RPN1	control	QD	OK	463.689	350.245	-0.404791	-2.60139	5e-05	0.00254504	yes
ENSG00000256235	SMIM3	control	QD	OK	28.3659	21.4217	-0.405089	-2.28944	0.00025	0.00946234	yes
ENSG00000186834	HEXIM1	control	QD	OK	8.23331	6.21016	-0.406842	-1.98028	0.0007	0.0214153	yes
ENSG00000126709	IFI6	control	QD	OK	30.6881	23.1402	-0.407277	-1.88081	0.00105	0.028769	yes
ENSG00000058262	SEC61A1	control	QD	OK	322.106	242.592	-0.409002	-2.39274	5e-05	0.00254504	yes
ENSG00000127191	TRAF2	control	QD	OK	19.6607	14.7934	-0.410362	-1.6224	0.0023	0.0499278	yes
ENSG00000198856	OSTC	control	QD	OK	293.599	220.671	-0.41195	-2.5913	5e-05	0.00254504	yes
ENSG00000142627	EPHA2	control	QD	OK	38.2569	28.726	-0.413365	-2.269	5e-05	0.00254504	yes
ENSG00000180879	SSR4	control	QD	OK	897.944	673.849	-0.4142	-2.35203	5e-05	0.00254504	yes
ENSG00000137210	TMEM14B	control	QD	OK	189.664	142.319	-0.414326	-2.45578	5e-05	0.00254504	yes
ENSG00000083444	PLOD1	control	QD	OK	213.184	159.822	-0.415639	-2.39759	5e-05	0.00254504	yes
ENSG00000090520	DNAJB11	control	QD	OK	234.271	175.455	-0.417076	-1.93429	0.0009	0.0258591	yes
ENSG00000166794	PPIB	control	QD	OK	2008.83	1503.92	-0.417631	-2.68253	5e-05	0.00254504	yes
ENSG00000146242	TPBG	control	QD	OK	10.5536	7.89334	-0.419028	-2.07429	0.0004	0.0139751	yes
ENSG00000179218	CALR	control	QD	OK	3719.83	2779.57	-0.420375	-2.43943	5e-05	0.00254504	yes
ENSG00000120708	TGFBI	control	QD	OK	1174.55	877.163	-0.421197	-2.25557	5e-05	0.00254504	yes
ENSG00000104419	NDRG1	control	QD	OK	465.33	347.448	-0.421458	-2.27435	5e-05	0.00254504	yes
ENSG00000122884	P4HA1	control	QD	OK	80.3788	59.9667	-0.422652	-2.63841	5e-05	0.00254504	yes
ENSG00000105048	TNNT1	control	QD	OK	104.685	78.0141	-0.424254	-2.2538	5e-05	0.00254504	yes
ENSG00000157514	TSC22D3	control	QD	OK	27.5833	20.5499	-0.424667	-2.08663	0.0001	0.00455946	yes
ENSG00000115457	IGFBP2	control	QD	OK	164.353	122.029	-0.429579	-2.432	5e-05	0.00254504	yes
ENSG00000162783	IER5	control	QD	OK	17.467	12.962	-0.430347	-2.47442	5e-05	0.00254504	yes
ENSG00000170955	CAVIN3	control	QD	OK	20.2508	15.0232	-0.430781	-1.77357	0.00145	0.0359728	yes
ENSG00000089041	P2RX7	control	QD	OK	9.75109	7.21457	-0.434649	-1.9222	0.00015	0.00637176	yes
ENSG00000137331	IER3	control	QD	OK	36.2306	26.7651	-0.436856	-2.30772	0.0001	0.00455946	yes
ENSG00000174109	C16orf91	control	QD	OK	27.0695	19.9956	-0.436985	-2.03587	0.00045	0.015403	yes
ENSG00000103490	PYCARD	control	QD	OK	42.3074	31.1839	-0.440106	-1.9951	0.0006	0.0187942	yes
ENSG00000111669	TPI1	control	QD	OK	1396.98	1028.33	-0.442006	-2.71976	5e-05	0.00254504	yes
ENSG00000275216	AL161431.1	control	QD	OK	2.64867	1.94889	-0.442615	-1.7461	0.0022	0.0485604	yes
ENSG00000160179	ABCG1	control	QD	OK	5.99308	4.40932	-0.442743	-1.77669	0.00095	0.0267108	yes
ENSG00000117461	PIK3R3	control	QD	OK	11.607	8.5297	-0.444434	-2.19459	0.0001	0.00455946	yes
ENSG00000165280	VCP	control	QD	OK	223.767	164.151	-0.446979	-1.90209	0.00055	0.0175066	yes
ENSG00000162772	ATF3	control	QD	OK	68.7344	50.4136	-0.447219	-1.85024	0.00135	0.0348844	yes
ENSG00000162236	STX5	control	QD	OK	63.422	46.4764	-0.448485	-2.5721	5e-05	0.00254504	yes
ENSG00000153066	TXNDC11	control	QD	OK	56.0249	41.0533	-0.448573	-1.78166	0.00215	0.0479044	yes
ENSG00000134070	IRAK2	control	QD	OK	5.28111	3.86418	-0.450677	-1.98714	0.00065	0.0201996	yes
ENSG00000175197	DDIT3	control	QD	OK	320.12	234.011	-0.452035	-1.85677	0.0016	0.0384815	yes
ENSG00000101294	HM13	control	QD	OK	438.485	320.222	-0.453457	-2.64272	5e-05	0.00254504	yes
ENSG00000273230	AC102953.2	control	QD	OK	4.63725	3.3865	-0.453477	-1.84792	0.0015	0.0369031	yes
ENSG00000156453	PCDH1	control	QD	OK	6.56092	4.78921	-0.45411	-1.7542	0.00115	0.0309347	yes
ENSG00000223496	EXOSC6	control	QD	OK	12.5512	9.14161	-0.457301	-2.58591	5e-05	0.00254504	yes
ENSG00000086619	ERO1B	control	QD	OK	10.1101	7.35486	-0.459021	-1.86998	0.00135	0.0348844	yes
ENSG00000196776	CD47	control	QD	OK	86.0618	62.4588	-0.46247	-1.97942	0.00075	0.0226515	yes
ENSG00000051108	HERPUD1	control	QD	OK	605.5	438.963	-0.464026	-2.50023	5e-05	0.00254504	yes
ENSG00000157191	NECAP2	control	QD	OK	44.5774	32.286	-0.465405	-2.17627	0.0001	0.00455946	yes
ENSG00000183617	MRPL54	control	QD	OK	49.3768	35.7449	-0.466094	-2.17596	0.00035	0.0125628	yes
ENSG00000256806	C17orf100	control	QD	OK	6.80859	4.92617	-0.466891	-1.77082	0.00125	0.0329492	yes
ENSG00000074842	MYDGF	control	QD	OK	292.485	211.403	-0.468367	-2.90844	5e-05	0.00254504	yes
ENSG00000155090	KLF10	control	QD	OK	9.84415	7.1033	-0.470777	-2.3436	5e-05	0.00254504	yes
ENSG00000133321	RARRES3	control	QD	OK	117.054	84.4537	-0.470941	-2.67129	5e-05	0.00254504	yes
ENSG00000132432	SEC61G	control	QD	OK	441.364	318.001	-0.472938	-2.86345	5e-05	0.00254504	yes
ENSG00000137094	DNAJB5	control	QD	OK	13.2312	9.51762	-0.475273	-2.11861	0.00015	0.00637176	yes
ENSG00000120742	SERP1	control	QD	OK	129.448	93.0732	-0.475934	-2.07188	0.0007	0.0214153	yes
ENSG00000204172	AGAP9	control	QD	OK	4.109	2.95152	-0.477328	-1.78771	0.0021	0.047236	yes
ENSG00000091986	CCDC80	control	QD	OK	82.8154	59.41	-0.479195	-1.78863	0.0021	0.047236	yes
ENSG00000134910	STT3A	control	QD	OK	459.311	329.379	-0.479725	-2.59034	5e-05	0.00254504	yes
ENSG00000104524	PYCR3	control	QD	OK	12.9015	9.24701	-0.480477	-2.07927	0.0002	0.0080061	yes
ENSG00000088451	TGDS	control	QD	OK	9.72907	6.97103	-0.480931	-1.93524	0.0009	0.0258591	yes
ENSG00000102144	PGK1	control	QD	OK	848.188	605.925	-0.485244	-2.00918	0.00055	0.0175066	yes
ENSG00000163734	CXCL3	control	QD	OK	15.728	11.2112	-0.488392	-1.77841	0.0021	0.047236	yes
ENSG00000166598	HSP90B1	control	QD	OK	2999.94	2135.54	-0.49033	-2.28335	5e-05	0.00254504	yes
ENSG00000254858	MPV17L2	control	QD	OK	24.4044	17.3071	-0.495781	-2.22797	0.0001	0.00455946	yes
ENSG00000117143	UAP1	control	QD	OK	51.2919	36.3373	-0.497278	-2.78178	5e-05	0.00254504	yes
ENSG00000119523	ALG2	control	QD	OK	46.2164	32.7282	-0.49787	-2.77302	5e-05	0.00254504	yes
ENSG00000142188	TMEM50B	control	QD	OK	84.0918	59.5462	-0.497957	-2.15479	5e-05	0.00254504	yes
ENSG00000178381	ZFAND2A	control	QD	OK	68.2116	48.0517	-0.505429	-2.5256	5e-05	0.00254504	yes
ENSG00000182118	FAM89A	control	QD	OK	10.6336	7.48157	-0.507222	-2.04521	0.00055	0.0175066	yes
ENSG00000008405	CRY1	control	QD	OK	6.90702	4.8576	-0.507821	-1.71961	0.001	0.0277207	yes
ENSG00000142871	CYR61	control	QD	OK	76.3857	53.7163	-0.507942	-3.08115	5e-05	0.00254504	yes
ENSG00000100906	NFKBIA	control	QD	OK	32.1915	22.6361	-0.508052	-2.19986	5e-05	0.00254504	yes
ENSG00000186376	ZNF75D	control	QD	OK	8.71597	6.12807	-0.508229	-2.12296	0.00015	0.00637176	yes
ENSG00000102580	DNAJC3	control	QD	OK	78.7398	55.2957	-0.509926	-3.27069	5e-05	0.00254504	yes
ENSG00000107201	DDX58	control	QD	OK	3.4593	2.42621	-0.511776	-2.10444	0.00035	0.0125628	yes
ENSG00000130487	KLHDC7B	control	QD	OK	7.15914	5.00967	-0.51507	-2.33939	0.00015	0.00637176	yes
ENSG00000175224	ATG13	control	QD	OK	68.2441	47.746	-0.515323	-1.8249	0.00055	0.0175066	yes
ENSG00000136158	SPRY2	control	QD	OK	9.86942	6.88692	-0.519108	-2.33505	5e-05	0.00254504	yes
ENSG00000258659	TRIM34	control	QD	OK	7.28484	5.06943	-0.523074	-1.88927	0.00065	0.0201996	yes
ENSG00000102158	MAGT1	control	QD	OK	122.722	85.3526	-0.523885	-3.28629	5e-05	0.00254504	yes
ENSG00000204315	FKBPL	control	QD	OK	8.69638	6.0418	-0.525437	-1.96799	0.0006	0.0187942	yes
ENSG00000076685	NT5C2	control	QD	OK	56.9926	39.5902	-0.525632	-1.85492	0.00085	0.0248457	yes
ENSG00000175745	NR2F1	control	QD	OK	98.8116	68.5812	-0.526869	-2.52225	0.0001	0.00455946	yes
ENSG00000149428	HYOU1	control	QD	OK	646.163	448.262	-0.527556	-2.8131	5e-05	0.00254504	yes
ENSG00000115963	RND3	control	QD	OK	23.2168	16.1012	-0.527996	-1.83182	0.0011	0.0297252	yes
ENSG00000145050	MANF	control	QD	OK	864.214	597.146	-0.533304	-2.76845	5e-05	0.00254504	yes
ENSG00000110330	BIRC2	control	QD	OK	44.3957	30.5977	-0.536995	-2.19628	0.0002	0.0080061	yes
ENSG00000247095	MIR210HG	control	QD	OK	48.7176	33.5762	-0.537004	-1.79128	0.002	0.0463098	yes
ENSG00000173540	GMPPB	control	QD	OK	48.2265	33.2003	-0.538629	-1.73472	0.0021	0.047236	yes
ENSG00000239713	APOBEC3G	control	QD	OK	65.1435	44.8063	-0.539919	-2.77714	5e-05	0.00254504	yes
ENSG00000147799	ARHGAP39	control	QD	OK	6.08922	4.18492	-0.54106	-2.35028	5e-05	0.00254504	yes
ENSG00000021762	OSBPL5	control	QD	OK	15.5689	10.6878	-0.542705	-1.86831	0.0005	0.016356	yes
ENSG00000077943	ITGA8	control	QD	OK	14.4606	9.91729	-0.544111	-2.01663	0.00025	0.00946234	yes
ENSG00000105518	TMEM205	control	QD	OK	83.1128	56.941	-0.545603	-2.64381	5e-05	0.00254504	yes
ENSG00000189184	PCDH18	control	QD	OK	38.2067	26.1576	-0.546596	-2.35795	5e-05	0.00254504	yes
ENSG00000081803	CADPS2	control	QD	OK	6.94717	4.75287	-0.547627	-2.29377	5e-05	0.00254504	yes
ENSG00000164442	CITED2	control	QD	OK	88.4387	60.486	-0.548078	-2.64084	5e-05	0.00254504	yes
ENSG00000155660	PDIA4	control	QD	OK	1139.34	779.198	-0.548138	-3.3249	5e-05	0.00254504	yes
ENSG00000100228	RAB36	control	QD	OK	8.81886	6.02791	-0.548934	-1.97596	0.00105	0.028769	yes
ENSG00000105204	DYRK1B	control	QD	OK	12.7278	8.68381	-0.551583	-1.72272	0.0023	0.0499278	yes
ENSG00000198832	SELENOM	control	QD	OK	85.4856	58.3224	-0.551632	-2.87535	5e-05	0.00254504	yes
ENSG00000146278	PNRC1	control	QD	OK	58.527	39.924	-0.551846	-2.68561	5e-05	0.00254504	yes
ENSG00000213654	GPSM3	control	QD	OK	16.1123	10.9489	-0.557371	-2.33381	5e-05	0.00254504	yes
ENSG00000170909	OSCAR	control	QD	OK	5.86423	3.98125	-0.55872	-1.58395	0.0021	0.047236	yes
ENSG00000149679	CABLES2	control	QD	OK	11.7962	8.0032	-0.559675	-2.66896	5e-05	0.00254504	yes
ENSG00000185022	MAFF	control	QD	OK	18.999	12.8428	-0.564965	-2.54166	5e-05	0.00254504	yes
ENSG00000110852	CLEC2B	control	QD	OK	15.2371	10.2828	-0.567358	-2.04787	0.0007	0.0214153	yes
ENSG00000148926	ADM	control	QD	OK	84.1858	56.6621	-0.571194	-2.73094	5e-05	0.00254504	yes
ENSG00000124766	SOX4	control	QD	OK	5.76356	3.87783	-0.571711	-2.89095	5e-05	0.00254504	yes
ENSG00000198805	PNP	control	QD	OK	21.855	14.6428	-0.577771	-2.74762	5e-05	0.00254504	yes
ENSG00000116717	GADD45A	control	QD	OK	56.7689	38.0314	-0.577911	-3.21726	5e-05	0.00254504	yes
ENSG00000111846	GCNT2	control	QD	OK	10.2977	6.89538	-0.578627	-1.70851	0.00025	0.00946234	yes
ENSG00000128590	DNAJB9	control	QD	OK	51.5673	34.5147	-0.579244	-2.34071	5e-05	0.00254504	yes
ENSG00000119771	KLHL29	control	QD	OK	2.51809	1.6771	-0.58636	-2.24212	0.00025	0.00946234	yes
ENSG00000162407	PLPP3	control	QD	OK	3.63322	2.41335	-0.590209	-1.60192	0.0015	0.0369031	yes
ENSG00000013375	PGM3	control	QD	OK	29.0465	19.2565	-0.593017	-1.46692	0.00225	0.0492042	yes
ENSG00000233276	GPX1	control	QD	OK	97.8377	64.7339	-0.595869	-3.40266	5e-05	0.00254504	yes
ENSG00000108602	ALDH3A1	control	QD	OK	133.539	88.1724	-0.598864	-3.21004	5e-05	0.00254504	yes
ENSG00000023318	ERP44	control	QD	OK	41.4175	27.221	-0.60552	-3.77007	5e-05	0.00254504	yes
ENSG00000214293	APTR	control	QD	OK	36.955	24.2302	-0.608963	-2.22274	0.00025	0.00946234	yes
ENSG00000125347	IRF1	control	QD	OK	64.3705	42.1277	-0.611629	-2.32805	5e-05	0.00254504	yes
ENSG00000257698	AC084033.3	control	QD	OK	23.8832	15.6298	-0.611695	-2.1571	0.0003	0.0110709	yes
ENSG00000070081	NUCB2	control	QD	OK	456.389	297.691	-0.616448	-3.10827	5e-05	0.00254504	yes
ENSG00000136932	TRMO	control	QD	OK	11.3006	7.35828	-0.61896	-1.73975	0.0017	0.0402311	yes
ENSG00000172197	MBOAT1	control	QD	OK	8.41435	5.47129	-0.62097	-2.52153	5e-05	0.00254504	yes
ENSG00000162624	LHX8	control	QD	OK	5.85113	3.79518	-0.624546	-2.30095	0.0001	0.00455946	yes
ENSG00000134107	BHLHE40	control	QD	OK	44.0088	28.3141	-0.636272	-3.00589	5e-05	0.00254504	yes
ENSG00000131871	SELENOS	control	QD	OK	125.302	80.487	-0.638585	-3.60665	5e-05	0.00254504	yes
ENSG00000166562	SEC11C	control	QD	OK	215.699	138.249	-0.641746	-3.36405	5e-05	0.00254504	yes
ENSG00000149090	PAMR1	control	QD	OK	60.9619	39.0003	-0.644422	-3.64361	5e-05	0.00254504	yes
ENSG00000186594	MIR22HG	control	QD	OK	43.1051	27.5286	-0.646926	-2.60197	5e-05	0.00254504	yes
ENSG00000072849	DERL2	control	QD	OK	192.977	123.049	-0.649198	-2.45212	5e-05	0.00254504	yes
ENSG00000184557	SOCS3	control	QD	OK	14.6094	9.27472	-0.65552	-3.09016	5e-05	0.00254504	yes
ENSG00000090238	YPEL3	control	QD	OK	12.3926	7.84282	-0.66003	-1.87415	0.0005	0.016356	yes
ENSG00000198855	FICD	control	QD	OK	16.8375	10.627	-0.663949	-1.95532	0.0003	0.0110709	yes
ENSG00000180730	SHISA2	control	QD	OK	7.20566	4.54409	-0.66514	-2.9462	5e-05	0.00254504	yes
ENSG00000163346	PBXIP1	control	QD	OK	40.2024	25.256	-0.670655	-3.38295	5e-05	0.00254504	yes
ENSG00000113811	SELENOK	control	QD	OK	86.7979	54.3171	-0.676253	-3.47642	5e-05	0.00254504	yes
ENSG00000132196	HSD17B7	control	QD	OK	27.3809	17.0999	-0.67918	-2.80508	5e-05	0.00254504	yes
ENSG00000223764	AL645608.1	control	QD	OK	3.9932	2.49007	-0.68136	-2.15111	0.00015	0.00637176	yes
ENSG00000128606	LRRC17	control	QD	OK	6.12785	3.80997	-0.685599	-1.85338	0.0005	0.016356	yes
ENSG00000111678	C12orf57	control	QD	OK	75.9317	46.7915	-0.698457	-3.36167	5e-05	0.00254504	yes
ENSG00000125726	CD70	control	QD	OK	21.9952	13.4879	-0.705522	-2.92085	5e-05	0.00254504	yes
ENSG00000061656	SPAG4	control	QD	OK	17.929	10.9481	-0.711612	-2.1051	0.00035	0.0125628	yes
ENSG00000115596	WNT6	control	QD	OK	4.65435	2.83532	-0.715065	-1.94135	0.0003	0.0110709	yes
ENSG00000163818	LZTFL1	control	QD	OK	18.9079	11.4673	-0.721465	-1.94752	0.0006	0.0187942	yes
ENSG00000251615	AC104825.2	control	QD	OK	1.43134	0.867963	-0.721665	-1.91889	0.0016	0.0384815	yes
ENSG00000187837	HIST1H1C	control	QD	OK	50.5581	30.5867	-0.725041	-3.34898	5e-05	0.00254504	yes
ENSG00000184164	CRELD2	control	QD	OK	620.771	374.817	-0.727874	-4.1524	5e-05	0.00254504	yes
ENSG00000169570	DTWD2	control	QD	OK	3.88391	2.32965	-0.737396	-2.23782	0.0001	0.00455946	yes
ENSG00000174837	ADGRE1	control	QD	OK	2.70519	1.62076	-0.739064	-1.79663	0.0004	0.0139751	yes
ENSG00000164949	GEM	control	QD	OK	8.28262	4.95646	-0.740777	-2.25615	5e-05	0.00254504	yes
ENSG00000128228	SDF2L1	control	QD	OK	342.147	204.604	-0.741782	-4.63784	5e-05	0.00254504	yes
ENSG00000108691	CCL2	control	QD	OK	151.956	90.3965	-0.749319	-4.32466	5e-05	0.00254504	yes
ENSG00000114315	HES1	control	QD	OK	6.29484	3.74332	-0.74985	-2.46402	5e-05	0.00254504	yes
ENSG00000147162	OGT	control	QD	OK	156.826	93.2447	-0.750067	-2.63942	0.0001	0.00455946	yes
ENSG00000154930	ACSS1	control	QD	OK	3.68162	2.18744	-0.751093	-2.77169	5e-05	0.00254504	yes
ENSG00000107968	MAP3K8	control	QD	OK	6.21106	3.68054	-0.754923	-1.78088	0.0004	0.0139751	yes
ENSG00000226856	AC093901.1	control	QD	OK	14.8454	8.78836	-0.75635	-2.07468	0.00055	0.0175066	yes
ENSG00000248323	LUCAT1	control	QD	OK	26.636	15.7677	-0.75641	-2.01815	0.001	0.0277207	yes
ENSG00000145040	UCN2	control	QD	OK	10.8686	6.43133	-0.756973	-2.19276	0.00025	0.00946234	yes
ENSG00000184205	TSPYL2	control	QD	OK	27.5187	16.2293	-0.761806	-3.0474	5e-05	0.00254504	yes
ENSG00000139624	CERS5	control	QD	OK	5.13855	3.00824	-0.772442	-1.09957	0.0016	0.0384815	yes
ENSG00000203666	EFCAB2	control	QD	OK	18.7067	10.8764	-0.782362	-2.3017	0.00015	0.00637176	yes
ENSG00000056558	TRAF1	control	QD	OK	2.32984	1.35076	-0.786456	-2.69868	5e-05	0.00254504	yes
ENSG00000159167	STC1	control	QD	OK	31.9159	18.4634	-0.789611	-4.53723	5e-05	0.00254504	yes
ENSG00000186998	EMID1	control	QD	OK	4.78133	2.76221	-0.79159	-1.59353	0.0005	0.016356	yes
ENSG00000059804	SLC2A3	control	QD	OK	31.1071	17.8781	-0.79905	-3.09008	5e-05	0.00254504	yes
ENSG00000143153	ATP1B1	control	QD	OK	22.7531	12.9975	-0.80783	-3.30003	5e-05	0.00254504	yes
ENSG00000162692	VCAM1	control	QD	OK	20.2226	11.5165	-0.81226	-4.34911	5e-05	0.00254504	yes
ENSG00000172183	ISG20	control	QD	OK	15.5146	8.78552	-0.820424	-2.34763	5e-05	0.00254504	yes
ENSG00000185507	IRF7	control	QD	OK	16.6817	9.40525	-0.826726	-2.84297	5e-05	0.00254504	yes
ENSG00000049249	TNFRSF9	control	QD	OK	19.1215	10.7758	-0.827408	-2.84173	5e-05	0.00254504	yes
ENSG00000077150	NFKB2	control	QD	OK	17.7991	9.8603	-0.852104	-2.64783	5e-05	0.00254504	yes
ENSG00000008517	IL32	control	QD	OK	24.7987	13.7173	-0.854261	-3.17525	5e-05	0.00254504	yes
ENSG00000134046	MBD2	control	QD	OK	53.183	29.1199	-0.868959	-1.91182	0.00105	0.028769	yes
ENSG00000163661	PTX3	control	QD	OK	80.7099	44.1428	-0.870567	-5.24828	5e-05	0.00254504	yes
ENSG00000181458	TMEM45A	control	QD	OK	35.235	19.148	-0.879813	-3.41545	5e-05	0.00254504	yes
ENSG00000263528	IKBKE	control	QD	OK	10.6889	5.73752	-0.897611	-2.7466	5e-05	0.00254504	yes
ENSG00000135506	OS9	control	QD	OK	2.54191	1.35478	-0.907854	-1.12445	0.00045	0.015403	yes
ENSG00000134215	VAV3	control	QD	OK	12.0597	6.39779	-0.914551	-2.62324	5e-05	0.00254504	yes
ENSG00000173221	GLRX	control	QD	OK	89.7959	47.5354	-0.917647	-2.48559	5e-05	0.00254504	yes
ENSG00000155961	RAB39B	control	QD	OK	1.47816	0.768393	-0.943887	-2.51509	0.00015	0.00637176	yes
ENSG00000262877	AC110285.2	control	QD	OK	4.19692	2.16492	-0.955021	-2.04756	0.0004	0.0139751	yes
ENSG00000065320	NTN1	control	QD	OK	4.59063	2.33775	-0.973573	-3.2771	5e-05	0.00254504	yes
ENSG00000236871	LINC00106	control	QD	OK	20.1947	10.2708	-0.975433	-2.26512	0.0006	0.0187942	yes
ENSG00000158887	MPZ	control	QD	OK	4.27676	2.12222	-1.01095	-1.78368	5e-05	0.00254504	yes
ENSG00000117525	F3	control	QD	OK	15.7849	7.62634	-1.04949	-2.25953	0.00015	0.00637176	yes
ENSG00000125657	TNFSF9	control	QD	OK	1.93127	0.932559	-1.05029	-2.16771	0.00085	0.0248457	yes
ENSG00000109705	NKX3-2	control	QD	OK	1.10758	0.534271	-1.05177	-2.14354	0.0008	0.0237965	yes
ENSG00000042062	RIPOR3	control	QD	OK	5.41886	2.60688	-1.05566	-2.36536	5e-05	0.00254504	yes
ENSG00000117318	ID3	control	QD	OK	52.6814	25.0429	-1.07289	-4.78051	5e-05	0.00254504	yes
ENSG00000159200	RCAN1	control	QD	OK	160.129	72.0551	-1.15206	-7.1094	5e-05	0.00254504	yes
ENSG00000171223	JUNB	control	QD	OK	12.8555	5.73775	-1.16383	-2.56416	0.0002	0.0080061	yes
ENSG00000164188	RANBP3L	control	QD	OK	2.61771	1.16674	-1.16582	-1.96804	5e-05	0.00254504	yes
ENSG00000166292	TMEM100	control	QD	OK	13.2509	5.87227	-1.1741	-4.28539	5e-05	0.00254504	yes
ENSG00000118515	SGK1	control	QD	OK	8.02178	3.51846	-1.18898	-2.0503	5e-05	0.00254504	yes
ENSG00000023445	BIRC3	control	QD	OK	6.15422	2.69204	-1.19288	-3.50501	5e-05	0.00254504	yes
ENSG00000118523	CTGF	control	QD	OK	11.7244	5.03814	-1.21855	-5.38737	5e-05	0.00254504	yes
ENSG00000213626	LBH	control	QD	OK	13.6418	5.79719	-1.23461	-1.82943	0.0016	0.0384815	yes
ENSG00000144802	NFKBIZ	control	QD	OK	6.36641	2.62744	-1.27682	-2.66998	5e-05	0.00254504	yes
ENSG00000167077	MEI1	control	QD	OK	14.1366	5.48932	-1.36474	-2.17917	5e-05	0.00254504	yes
ENSG00000167861	HID1	control	QD	OK	4.10179	1.59068	-1.36661	-1.54768	0.00055	0.0175066	yes
ENSG00000173432	SAA1	control	QD	OK	10.2485	3.97059	-1.36799	-2.88633	5e-05	0.00254504	yes
ENSG00000137821	LRRC49	control	QD	OK	13.8291	5.32529	-1.37678	-1.864	5e-05	0.00254504	yes
ENSG00000141668	CBLN2	control	QD	OK	3.88152	1.47302	-1.39785	-1.46489	0.0004	0.0139751	yes
ENSG00000256232	LINC02387	control	QD	OK	3.35745	1.24737	-1.42847	-2.34279	0.0009	0.0258591	yes
ENSG00000172201	ID4	control	QD	OK	1.15197	0.416223	-1.46868	-2.56785	0.0005	0.016356	yes
ENSG00000169429	CXCL8	control	QD	OK	2.70653	0.847791	-1.67466	-2.44594	5e-05	0.00254504	yes
ENSG00000205795	CYS1	control	QD	OK	1.19627	0.346265	-1.78859	-1.36656	0.0022	0.0485604	yes
ENSG00000169896	ITGAM	control	QD	OK	1.44127	0.412668	-1.80428	-0.763662	0.0022	0.0485604	yes
ENSG00000136244	IL6	control	QD	OK	48.0474	13.3924	-1.84304	-7.70085	5e-05	0.00254504	yes
ENSG00000187678	SPRY4	control	QD	OK	2.35528	0.595067	-1.98478	-2.02994	5e-05	0.00254504	yes
ENSG00000089163	SIRT4	control	QD	OK	2.46568	0.585115	-2.07519	-1.87123	0.00075	0.0226515	yes
ENSG00000147168	IL2RG	control	QD	OK	2.64207	0.600193	-2.13817	-1.27784	5e-05	0.00254504	yes
ENSG00000170345	FOS	control	QD	OK	2.71946	0.608211	-2.16068	-1.28708	0.00015	0.00637176	yes
ENSG00000120738	EGR1	control	QD	OK	29.1221	5.35573	-2.44296	-12.1554	5e-05	0.00254504	yes
