# Supplementary material for: A Transcriptomic Analysis of T98G Human Glioblastoma Cells after Exposure to Cadmium-Selenium Quantum Dots Mainly Reveals Alterations in Neuroinflammation Processes and Hypothalamus Regulation
Source: Int J Mol Sci. 2022 Feb 18;23(4):2267. doi: 10.3390/ijms23042267 (PMC8877384; doi:10.3390/ijms23042267)
Supplement: Supplementary file 1 [file ijms-23-02267-s001.zip › Table S2.xls]

## Sheet: Hoja1
Table S2. List of the genes expressed by T98G cells. The list of genes was obtained from the unexposed control cells used in the RNAseq experiment. The genes on this list were employed as a control for the annotation of the differentially expressed genes after CdSe-QDs exposure using the GO Consortium tool (http://geneontology.org/). This experiment with CdSe-QDs was run in parallel with the expe…
gene_id	gene
ENSG00000000003	TSPAN6
ENSG00000000419	DPM1
ENSG00000000457	SCYL3
ENSG00000000460	C1orf112
ENSG00000001036	FUCA2
ENSG00000001084	GCLC
ENSG00000001167	NFYA
ENSG00000001461	NIPAL3
ENSG00000001497	LAS1L
ENSG00000001617	SEMA3F
ENSG00000001629	ANKIB1
ENSG00000001630	CYP51A1
ENSG00000001631	KRIT1
ENSG00000002016	RAD52
ENSG00000002330	BAD
ENSG00000002549	LAP3
ENSG00000002586	CD99
ENSG00000002746	HECW1
ENSG00000002822	MAD1L1
ENSG00000002834	LASP1
ENSG00000002919	SNX11
ENSG00000003056	M6PR
ENSG00000003137	CYP26B1
ENSG00000003249	DBNDD1
ENSG00000003393	ALS2
ENSG00000003402	CFLAR
ENSG00000003436	TFPI
ENSG00000003509	NDUFAF7
ENSG00000003756	RBM5
ENSG00000003989	SLC7A2
ENSG00000004059	ARF5
ENSG00000004139	SARM1
ENSG00000004142	POLDIP2
ENSG00000004399	PLXND1
ENSG00000004455	AK2
ENSG00000004487	KDM1A
ENSG00000004534	RBM6
ENSG00000004660	CAMKK1
ENSG00000004700	RECQL
ENSG00000004766	VPS50
ENSG00000004777	ARHGAP33
ENSG00000004779	NDUFAB1
ENSG00000004864	SLC25A13
ENSG00000004866	ST7
ENSG00000004897	CDC27
ENSG00000004961	HCCS
ENSG00000004975	DVL2
ENSG00000005007	UPF1
ENSG00000005020	SKAP2
ENSG00000005022	SLC25A5
ENSG00000005059	MCUB
ENSG00000005075	POLR2J
ENSG00000005100	DHX33
ENSG00000005156	LIG3
ENSG00000005175	RPAP3
ENSG00000005189	REXO5
ENSG00000005194	CIAPIN1
ENSG00000005206	SPPL2B
ENSG00000005238	FAM214B
ENSG00000005243	COPZ2
ENSG00000005249	PRKAR2B
ENSG00000005302	MSL3
ENSG00000005339	CREBBP
ENSG00000005436	GCFC2
ENSG00000005448	WDR54
ENSG00000005469	CROT
ENSG00000005483	KMT2E
ENSG00000005486	RHBDD2
ENSG00000005700	IBTK
ENSG00000005801	ZNF195
ENSG00000005810	MYCBP2
ENSG00000005812	FBXL3
ENSG00000005882	PDK2
ENSG00000005884	ITGA3
ENSG00000005889	ZFX
ENSG00000005893	LAMP2
ENSG00000006007	GDE1
ENSG00000006015	REX1BD
ENSG00000006016	CRLF1
ENSG00000006025	OSBPL7
ENSG00000006062	MAP3K14
ENSG00000006071	ABCC8
ENSG00000006118	TMEM132A
ENSG00000006125	AP2B1
ENSG00000006194	ZNF263
ENSG00000006210	CX3CL1
ENSG00000006282	SPATA20
ENSG00000006283	CACNA1G
ENSG00000006327	TNFRSF12A
ENSG00000006432	MAP3K9
ENSG00000006451	RALA
ENSG00000006453	BAIAP2L1
ENSG00000006459	KDM7A
ENSG00000006530	AGK
ENSG00000006534	ALDH3B1
ENSG00000006576	PHTF2
ENSG00000006606	CCL26
ENSG00000006607	FARP2
ENSG00000006625	GGCT
ENSG00000006634	DBF4
ENSG00000006652	IFRD1
ENSG00000006695	COX10
ENSG00000006704	GTF2IRD1
ENSG00000006712	PAF1
ENSG00000006715	VPS41
ENSG00000006744	ELAC2
ENSG00000006756	ARSD
ENSG00000006831	ADIPOR2
ENSG00000007047	MARK4
ENSG00000007080	CCDC124
ENSG00000007168	PAFAH1B1
ENSG00000007202	KIAA0100
ENSG00000007255	TRAPPC6A
ENSG00000007341	ST7L
ENSG00000007376	RPUSD1
ENSG00000007384	RHBDF1
ENSG00000007392	LUC7L
ENSG00000007520	TSR3
ENSG00000007541	PIGQ
ENSG00000007545	CRAMP1
ENSG00000007866	TEAD3
ENSG00000007923	DNAJC11
ENSG00000007944	MYLIP
ENSG00000008018	PSMB1
ENSG00000008083	JARID2
ENSG00000008130	NADK
ENSG00000008256	CYTH3
ENSG00000008277	ADAM22
ENSG00000008282	SYPL1
ENSG00000008283	CYB561
ENSG00000008294	SPAG9
ENSG00000008300	CELSR3
ENSG00000008311	AASS
ENSG00000008324	SS18L2
ENSG00000008382	MPND
ENSG00000008394	MGST1
ENSG00000008405	CRY1
ENSG00000008441	NFIX
ENSG00000008513	ST3GAL1
ENSG00000008517	IL32
ENSG00000008710	PKD1
ENSG00000008735	MAPK8IP2
ENSG00000008838	MED24
ENSG00000008869	HEATR5B
ENSG00000008952	SEC62
ENSG00000008988	RPS20
ENSG00000009307	CSDE1
ENSG00000009335	UBE3C
ENSG00000009413	REV3L
ENSG00000009780	FAM76A
ENSG00000009830	POMT2
ENSG00000009844	VTA1
ENSG00000009954	BAZ1B
ENSG00000010017	RANBP9
ENSG00000010072	SPRTN
ENSG00000010165	METTL13
ENSG00000010219	DYRK4
ENSG00000010244	ZNF207
ENSG00000010256	UQCRC1
ENSG00000010270	STARD3NL
ENSG00000010278	CD9
ENSG00000010292	NCAPD2
ENSG00000010295	IFFO1
ENSG00000010310	GIPR
ENSG00000010318	PHF7
ENSG00000010322	NISCH
ENSG00000010361	FUZ
ENSG00000010404	IDS
ENSG00000010539	ZNF200
ENSG00000010626	LRRC23
ENSG00000010704	HFE
ENSG00000010803	SCMH1
ENSG00000010810	FYN
ENSG00000010818	HIVEP2
ENSG00000011007	ELOA
ENSG00000011009	LYPLA2
ENSG00000011021	CLCN6
ENSG00000011028	MRC2
ENSG00000011052	NME1-NME2
ENSG00000011105	TSPAN9
ENSG00000011114	BTBD7
ENSG00000011132	APBA3
ENSG00000011143	MKS1
ENSG00000011198	ABHD5
ENSG00000011243	AKAP8L
ENSG00000011258	MBTD1
ENSG00000011260	UTP18
ENSG00000011275	RNF216
ENSG00000011295	TTC19
ENSG00000011304	PTBP1
ENSG00000011332	DPF1
ENSG00000011376	LARS2
ENSG00000011405	PIK3C2A
ENSG00000011422	PLAUR
ENSG00000011426	ANLN
ENSG00000011451	WIZ
ENSG00000011454	RABGAP1
ENSG00000011478	QPCTL
ENSG00000011485	PPP5C
ENSG00000011523	CEP68
ENSG00000011566	MAP4K3
ENSG00000011638	TMEM159
ENSG00000012048	BRCA1
ENSG00000012061	ERCC1
ENSG00000012124	CD22
ENSG00000012171	SEMA3B
ENSG00000012174	MBTPS2
ENSG00000012211	PRICKLE3
ENSG00000012232	EXTL3
ENSG00000012660	ELOVL5
ENSG00000012817	KDM5D
ENSG00000012822	CALCOCO1
ENSG00000012963	UBR7
ENSG00000012983	MAP4K5
ENSG00000013016	EHD3
ENSG00000013275	PSMC4
ENSG00000013288	MAN2B2
ENSG00000013297	CLDN11
ENSG00000013306	SLC25A39
ENSG00000013364	MVP
ENSG00000013374	NUB1
ENSG00000013375	PGM3
ENSG00000013392	RWDD2A
ENSG00000013441	CLK1
ENSG00000013503	POLR3B
ENSG00000013523	ANGEL1
ENSG00000013561	RNF14
ENSG00000013563	DNASE1L1
ENSG00000013573	DDX11
ENSG00000013583	HEBP1
ENSG00000013588	GPRC5A
ENSG00000013619	MAMLD1
ENSG00000013810	TACC3
ENSG00000014123	UFL1
ENSG00000014138	POLA2
ENSG00000014164	ZC3H3
ENSG00000014216	CAPN1
ENSG00000014641	MDH1
ENSG00000014824	SLC30A9
ENSG00000014914	MTMR11
ENSG00000014919	COX15
ENSG00000015153	YAF2
ENSG00000015171	ZMYND11
ENSG00000015475	BID
ENSG00000015479	MATR3
ENSG00000015532	XYLT2
ENSG00000015676	NUDCD3
ENSG00000016864	GLT8D1
ENSG00000017260	ATP2C1
ENSG00000017797	RALBP1
ENSG00000018189	RUFY3
ENSG00000018408	WWTR1
ENSG00000018510	AGPS
ENSG00000018610	CXorf56
ENSG00000018699	TTC27
ENSG00000019144	PHLDB1
ENSG00000019485	PRDM11
ENSG00000019549	SNAI2
ENSG00000019582	CD74
ENSG00000019995	ZRANB1
ENSG00000020129	NCDN
ENSG00000020181	ADGRA2
ENSG00000020256	ZFP64
ENSG00000020426	MNAT1
ENSG00000020577	SAMD4A
ENSG00000020922	MRE11
ENSG00000021300	PLEKHB1
ENSG00000021574	SPAST
ENSG00000021762	OSBPL5
ENSG00000021776	AQR
ENSG00000021826	CPS1
ENSG00000022267	FHL1
ENSG00000022277	RTFDC1
ENSG00000022567	SLC45A4
ENSG00000022840	RNF10
ENSG00000022976	ZNF839
ENSG00000023041	ZDHHC6
ENSG00000023191	RNH1
ENSG00000023228	NDUFS1
ENSG00000023287	RB1CC1
ENSG00000023318	ERP44
ENSG00000023330	ALAS1
ENSG00000023445	BIRC3
ENSG00000023516	AKAP11
ENSG00000023572	GLRX2
ENSG00000023608	SNAPC1
ENSG00000023697	DERA
ENSG00000023734	STRAP
ENSG00000023839	ABCC2
ENSG00000023902	PLEKHO1
ENSG00000023909	GCLM
ENSG00000024048	UBR2
ENSG00000024422	EHD2
ENSG00000024526	DEPDC1
ENSG00000024862	CCDC28A
ENSG00000025156	HSF2
ENSG00000025293	PHF20
ENSG00000025434	NR1H3
ENSG00000025708	TYMP
ENSG00000025770	NCAPH2
ENSG00000025772	TOMM34
ENSG00000025796	SEC63
ENSG00000025800	KPNA6
ENSG00000026025	VIM
ENSG00000026036	RTEL1-TNFRSF6B
ENSG00000026103	FAS
ENSG00000026297	RNASET2
ENSG00000026508	CD44
ENSG00000026559	KCNG1
ENSG00000026652	AGPAT4
ENSG00000026950	BTN3A1
ENSG00000027001	MIPEP
ENSG00000027697	IFNGR1
ENSG00000027847	B4GALT7
ENSG00000028116	VRK2
ENSG00000028203	VEZT
ENSG00000028310	BRD9
ENSG00000028528	SNX1
ENSG00000028839	TBPL1
ENSG00000029153	ARNTL2
ENSG00000029363	BCLAF1
ENSG00000029364	SLC39A9
ENSG00000029639	TFB1M
ENSG00000029725	RABEP1
ENSG00000029993	HMGB3
ENSG00000030066	NUP160
ENSG00000030582	GRN
ENSG00000031003	FAM13B
ENSG00000031081	ARHGAP31
ENSG00000031691	CENPQ
ENSG00000031698	SARS
ENSG00000031823	RANBP3
ENSG00000032219	ARID4A
ENSG00000032389	EIPR1
ENSG00000032444	PNPLA6
ENSG00000032742	IFT88
ENSG00000033011	ALG1
ENSG00000033030	ZCCHC8
ENSG00000033050	ABCF2
ENSG00000033100	CHPF2
ENSG00000033170	FUT8
ENSG00000033178	UBA6
ENSG00000033327	GAB2
ENSG00000033627	ATP6V0A1
ENSG00000033800	PIAS1
ENSG00000033867	SLC4A7
ENSG00000034053	APBA2
ENSG00000034152	MAP2K3
ENSG00000034510	TMSB10
ENSG00000034533	ASTE1
ENSG00000034677	RNF19A
ENSG00000034693	PEX3
ENSG00000035115	SH3YL1
ENSG00000035141	FAM136A
ENSG00000035403	VCL
ENSG00000035499	DEPDC1B
ENSG00000035664	DAPK2
ENSG00000035681	NSMAF
ENSG00000035687	ADSS
ENSG00000035862	TIMP2
ENSG00000035928	RFC1
ENSG00000036054	TBC1D23
ENSG00000036257	CUL3
ENSG00000036448	MYOM2
ENSG00000036549	ZZZ3
ENSG00000037042	TUBG2
ENSG00000037241	RPL26L1
ENSG00000037474	NSUN2
ENSG00000037637	FBXO42
ENSG00000037749	MFAP3
ENSG00000037757	MRI1
ENSG00000037897	METTL1
ENSG00000037965	HOXC8
ENSG00000038002	AGA
ENSG00000038210	PI4K2B
ENSG00000038219	BOD1L1
ENSG00000038274	MAT2B
ENSG00000038358	EDC4
ENSG00000038382	TRIO
ENSG00000038532	CLEC16A
ENSG00000039123	SKIV2L2
ENSG00000039139	DNAH5
ENSG00000039319	ZFYVE16
ENSG00000039523	RIPOR1
ENSG00000039560	RAI14
ENSG00000039650	PNKP
ENSG00000040199	PHLPP2
ENSG00000040275	SPDL1
ENSG00000040341	STAU2
ENSG00000040487	PQLC2
ENSG00000040531	CTNS
ENSG00000040608	RTN4R
ENSG00000040633	PHF23
ENSG00000040933	INPP4A
ENSG00000041353	RAB27B
ENSG00000041357	PSMA4
ENSG00000041802	LSG1
ENSG00000041880	PARP3
ENSG00000041982	TNC
ENSG00000041988	THAP3
ENSG00000042062	RIPOR3
ENSG00000042088	TDP1
ENSG00000042286	AIFM2
ENSG00000042317	SPATA7
ENSG00000042429	MED17
ENSG00000042445	RETSAT
ENSG00000042493	CAPG
ENSG00000042753	AP2S1
ENSG00000043093	DCUN1D1
ENSG00000043143	JADE2
ENSG00000043355	ZIC2
ENSG00000043514	TRIT1
ENSG00000044090	CUL7
ENSG00000044115	CTNNA1
ENSG00000044446	PHKA2
ENSG00000044459	CNTLN
ENSG00000044574	HSPA5
ENSG00000046647	GEMIN8
ENSG00000046651	OFD1
ENSG00000046889	PREX2
ENSG00000047056	WDR37
ENSG00000047188	YTHDC2
ENSG00000047230	CTPS2
ENSG00000047249	ATP6V1H
ENSG00000047315	POLR2B
ENSG00000047346	FAM214A
ENSG00000047410	TPR
ENSG00000047457	CP
ENSG00000047578	KIAA0556
ENSG00000047579	DTNBP1
ENSG00000047621	C12orf4
ENSG00000047634	SCML1
ENSG00000047644	WWC3
ENSG00000047849	MAP4
ENSG00000047932	GOPC
ENSG00000048028	USP28
ENSG00000048052	HDAC9
ENSG00000048140	TSPAN17
ENSG00000048162	NOP16
ENSG00000048342	CC2D2A
ENSG00000048392	RRM2B
ENSG00000048405	ZNF800
ENSG00000048471	SNX29
ENSG00000048544	MRPS10
ENSG00000048649	RSF1
ENSG00000048707	VPS13D
ENSG00000048828	FAM120A
ENSG00000048991	R3HDM1
ENSG00000049130	KITLG
ENSG00000049167	ERCC8
ENSG00000049239	H6PD
ENSG00000049245	VAMP3
ENSG00000049246	PER3
ENSG00000049249	TNFRSF9
ENSG00000049323	LTBP1
ENSG00000049449	RCN1
ENSG00000049541	RFC2
ENSG00000049618	ARID1B
ENSG00000049656	CLPTM1L
ENSG00000049759	NEDD4L
ENSG00000049769	PPP1R3F
ENSG00000049860	HEXB
ENSG00000049883	PTCD2
ENSG00000050165	DKK3
ENSG00000050344	NFE2L3
ENSG00000050393	MCUR1
ENSG00000050405	LIMA1
ENSG00000050426	LETMD1
ENSG00000050748	MAPK9
ENSG00000050820	BCAR1
ENSG00000051009	FAM160A2
ENSG00000051108	HERPUD1
ENSG00000051128	HOMER3
ENSG00000051180	RAD51
ENSG00000051341	POLQ
ENSG00000051382	PIK3CB
ENSG00000051523	CYBA
ENSG00000051596	THOC3
ENSG00000051620	HEBP2
ENSG00000051825	MPHOSPH9
ENSG00000052126	PLEKHA5
ENSG00000052723	SIKE1
ENSG00000052749	RRP12
ENSG00000052795	FNIP2
ENSG00000052802	MSMO1
ENSG00000052841	TTC17
ENSG00000052850	ALX4
ENSG00000053254	FOXN3
ENSG00000053371	AKR7A2
ENSG00000053372	MRTO4
ENSG00000053501	USE1
ENSG00000053747	LAMA3
ENSG00000053770	AP5M1
ENSG00000053900	ANAPC4
ENSG00000054116	TRAPPC3
ENSG00000054118	THRAP3
ENSG00000054148	PHPT1
ENSG00000054267	ARID4B
ENSG00000054277	OPN3
ENSG00000054282	SDCCAG8
ENSG00000054356	PTPRN
ENSG00000054392	HHAT
ENSG00000054523	KIF1B
ENSG00000054598	FOXC1
ENSG00000054611	TBC1D22A
ENSG00000054654	SYNE2
ENSG00000054690	PLEKHH1
ENSG00000054793	ATP9A
ENSG00000054965	FAM168A
ENSG00000054967	RELT
ENSG00000055044	NOP58
ENSG00000055070	SZRD1
ENSG00000055118	KCNH2
ENSG00000055130	CUL1
ENSG00000055147	FAM114A2
ENSG00000055163	CYFIP2
ENSG00000055208	TAB2
ENSG00000055211	GINM1
ENSG00000055332	EIF2AK2
ENSG00000055483	USP36
ENSG00000055609	KMT2C
ENSG00000055732	MCOLN3
ENSG00000055917	PUM2
ENSG00000055950	MRPL43
ENSG00000055955	ITIH4
ENSG00000056050	HPF1
ENSG00000056097	ZFR
ENSG00000056277	ZNF280C
ENSG00000056487	PHF21B
ENSG00000056558	TRAF1
ENSG00000056586	RC3H2
ENSG00000056998	GYG2
ENSG00000057019	DCBLD2
ENSG00000057252	SOAT1
ENSG00000057608	GDI2
ENSG00000057657	PRDM1
ENSG00000057663	ATG5
ENSG00000057757	PITHD1
ENSG00000057935	MTA3
ENSG00000058056	USP13
ENSG00000058063	ATP11B
ENSG00000058091	CDK14
ENSG00000058262	SEC61A1
ENSG00000058272	PPP1R12A
ENSG00000058453	CROCC
ENSG00000058600	POLR3E
ENSG00000058668	ATP2B4
ENSG00000058673	ZC3H11A
ENSG00000058729	RIOK2
ENSG00000058799	YIPF1
ENSG00000058804	NDC1
ENSG00000058866	DGKG
ENSG00000059122	FLYWCH1
ENSG00000059145	UNKL
ENSG00000059377	TBXAS1
ENSG00000059378	PARP12
ENSG00000059573	ALDH18A1
ENSG00000059588	TARBP1
ENSG00000059691	GATB
ENSG00000059728	MXD1
ENSG00000059758	CDK17
ENSG00000059769	DNAJC25
ENSG00000059804	SLC2A3
ENSG00000060069	CTDP1
ENSG00000060138	YBX3
ENSG00000060140	STYK1
ENSG00000060237	WNK1
ENSG00000060339	CCAR1
ENSG00000060491	OGFR
ENSG00000060642	PIGV
ENSG00000060656	PTPRU
ENSG00000060688	SNRNP40
ENSG00000060749	QSER1
ENSG00000060762	MPC1
ENSG00000060971	ACAA1
ENSG00000060982	BCAT1
ENSG00000061273	HDAC7
ENSG00000061337	LZTS1
ENSG00000061656	SPAG4
ENSG00000061676	NCKAP1
ENSG00000061794	MRPS35
ENSG00000061936	SFSWAP
ENSG00000061938	TNK2
ENSG00000061987	MON2
ENSG00000062194	GPBP1
ENSG00000062282	DGAT2
ENSG00000062370	ZNF112
ENSG00000062485	CS
ENSG00000062524	LTK
ENSG00000062582	MRPS24
ENSG00000062598	ELMO2
ENSG00000062650	WAPL
ENSG00000062716	VMP1
ENSG00000062725	APPBP2
ENSG00000062822	POLD1
ENSG00000063046	EIF4B
ENSG00000063127	SLC6A16
ENSG00000063169	BICRA
ENSG00000063176	SPHK2
ENSG00000063177	RPL18
ENSG00000063241	ISOC2
ENSG00000063244	U2AF2
ENSG00000063245	EPN1
ENSG00000063322	MED29
ENSG00000063438	AHRR
ENSG00000063587	ZNF275
ENSG00000063601	MTMR1
ENSG00000063660	GPC1
ENSG00000063761	ADCK1
ENSG00000063854	HAGH
ENSG00000063978	RNF4
ENSG00000064012	CASP8
ENSG00000064042	LIMCH1
ENSG00000064102	INTS13
ENSG00000064115	TM7SF3
ENSG00000064199	SPA17
ENSG00000064225	ST3GAL6
ENSG00000064309	CDON
ENSG00000064313	TAF2
ENSG00000064393	HIPK2
ENSG00000064419	TNPO3
ENSG00000064489	BORCS8-MEF2B
ENSG00000064490	RFXANK
ENSG00000064545	TMEM161A
ENSG00000064547	LPAR2
ENSG00000064601	CTSA
ENSG00000064607	SUGP2
ENSG00000064651	SLC12A2
ENSG00000064652	SNX24
ENSG00000064655	EYA2
ENSG00000064666	CNN2
ENSG00000064687	ABCA7
ENSG00000064692	SNCAIP
ENSG00000064703	DDX20
ENSG00000064886	CHI3L2
ENSG00000064932	SBNO2
ENSG00000064933	PMS1
ENSG00000064961	HMG20B
ENSG00000064995	TAF11
ENSG00000064999	ANKS1A
ENSG00000065000	AP3D1
ENSG00000065029	ZNF76
ENSG00000065054	SLC9A3R2
ENSG00000065057	NTHL1
ENSG00000065060	UHRF1BP1
ENSG00000065135	GNAI3
ENSG00000065150	IPO5
ENSG00000065154	OAT
ENSG00000065183	WDR3
ENSG00000065243	PKN2
ENSG00000065268	WDR18
ENSG00000065308	TRAM2
ENSG00000065320	NTN1
ENSG00000065325	GLP2R
ENSG00000065328	MCM10
ENSG00000065357	DGKA
ENSG00000065413	ANKRD44
ENSG00000065427	KARS
ENSG00000065457	ADAT1
ENSG00000065485	PDIA5
ENSG00000065491	TBC1D22B
ENSG00000065518	NDUFB4
ENSG00000065526	SPEN
ENSG00000065534	MYLK
ENSG00000065548	ZC3H15
ENSG00000065559	MAP2K4
ENSG00000065600	TMEM206
ENSG00000065613	SLK
ENSG00000065615	CYB5R4
ENSG00000065665	SEC61A2
ENSG00000065717	TLE2
ENSG00000065802	ASB1
ENSG00000065809	FAM107B
ENSG00000065833	ME1
ENSG00000065882	TBC1D1
ENSG00000065883	CDK13
ENSG00000065911	MTHFD2
ENSG00000065923	SLC9A7
ENSG00000065970	FOXJ2
ENSG00000065978	YBX1
ENSG00000065989	PDE4A
ENSG00000066027	PPP2R5A
ENSG00000066044	ELAVL1
ENSG00000066084	DIP2B
ENSG00000066117	SMARCD1
ENSG00000066135	KDM4A
ENSG00000066136	NFYC
ENSG00000066248	NGEF
ENSG00000066279	ASPM
ENSG00000066322	ELOVL1
ENSG00000066379	ZNRD1
ENSG00000066382	MPPED2
ENSG00000066422	ZBTB11
ENSG00000066427	ATXN3
ENSG00000066455	GOLGA5
ENSG00000066557	LRRC40
ENSG00000066583	ISOC1
ENSG00000066629	EML1
ENSG00000066651	TRMT11
ENSG00000066654	THUMPD1
ENSG00000066697	MSANTD3
ENSG00000066739	ATG2B
ENSG00000066777	ARFGEF1
ENSG00000066827	ZFAT
ENSG00000066855	MTFR1
ENSG00000066926	FECH
ENSG00000066933	MYO9A
ENSG00000067048	DDX3Y
ENSG00000067057	PFKP
ENSG00000067064	IDI1
ENSG00000067066	SP100
ENSG00000067082	KLF6
ENSG00000067113	PLPP1
ENSG00000067141	NEO1
ENSG00000067167	TRAM1
ENSG00000067177	PHKA1
ENSG00000067182	TNFRSF1A
ENSG00000067191	CACNB1
ENSG00000067208	EVI5
ENSG00000067221	STOML1
ENSG00000067225	PKM
ENSG00000067248	DHX29
ENSG00000067334	DNTTIP2
ENSG00000067365	METTL22
ENSG00000067369	TP53BP1
ENSG00000067445	TRO
ENSG00000067533	RRP15
ENSG00000067560	RHOA
ENSG00000067596	DHX8
ENSG00000067646	ZFY
ENSG00000067704	IARS2
ENSG00000067798	NAV3
ENSG00000067829	IDH3G
ENSG00000067836	ROGDI
ENSG00000067840	PDZD4
ENSG00000067900	ROCK1
ENSG00000067955	CBFB
ENSG00000067992	PDK3
ENSG00000068001	HYAL2
ENSG00000068024	HDAC4
ENSG00000068028	RASSF1
ENSG00000068079	IFI35
ENSG00000068097	HEATR6
ENSG00000068120	COASY
ENSG00000068137	PLEKHH3
ENSG00000068305	MEF2A
ENSG00000068308	OTUD5
ENSG00000068323	TFE3
ENSG00000068354	TBC1D25
ENSG00000068366	ACSL4
ENSG00000068383	INPP5A
ENSG00000068394	GPKOW
ENSG00000068400	GRIPAP1
ENSG00000068438	FTSJ1
ENSG00000068489	PRR11
ENSG00000068650	ATP11A
ENSG00000068654	POLR1A
ENSG00000068697	LAPTM4A
ENSG00000068724	TTC7A
ENSG00000068745	IP6K2
ENSG00000068784	SRBD1
ENSG00000068796	KIF2A
ENSG00000068878	PSME4
ENSG00000068885	IFT80
ENSG00000068903	SIRT2
ENSG00000068912	ERLEC1
ENSG00000068971	PPP2R5B
ENSG00000069011	PITX1
ENSG00000069248	NUP133
ENSG00000069275	NUCKS1
ENSG00000069329	VPS35
ENSG00000069345	DNAJA2
ENSG00000069399	BCL3
ENSG00000069424	KCNAB2
ENSG00000069493	CLEC2D
ENSG00000069509	FUNDC1
ENSG00000069702	TGFBR3
ENSG00000069849	ATP1B3
ENSG00000069869	NEDD4
ENSG00000069943	PIGB
ENSG00000069956	MAPK6
ENSG00000069966	GNB5
ENSG00000069974	RAB27A
ENSG00000069998	HDHD5
ENSG00000070010	UFD1
ENSG00000070018	LRP6
ENSG00000070047	PHRF1
ENSG00000070061	ELP1
ENSG00000070081	NUCB2
ENSG00000070087	PFN2
ENSG00000070214	SLC44A1
ENSG00000070269	TMEM260
ENSG00000070366	SMG6
ENSG00000070367	EXOC5
ENSG00000070371	CLTCL1
ENSG00000070404	FSTL3
ENSG00000070413	DGCR2
ENSG00000070423	RNF126
ENSG00000070444	MNT
ENSG00000070476	ZXDC
ENSG00000070495	JMJD6
ENSG00000070501	POLB
ENSG00000070610	GBA2
ENSG00000070614	NDST1
ENSG00000070718	AP3M2
ENSG00000070731	ST6GALNAC2
ENSG00000070756	PABPC1
ENSG00000070761	CFAP20
ENSG00000070770	CSNK2A2
ENSG00000070778	PTPN21
ENSG00000070785	EIF2B3
ENSG00000070814	TCOF1
ENSG00000070831	CDC42
ENSG00000070882	OSBPL3
ENSG00000070950	RAD18
ENSG00000070961	ATP2B1
ENSG00000071051	NCK2
ENSG00000071054	MAP4K4
ENSG00000071082	RPL31
ENSG00000071127	WDR1
ENSG00000071189	SNX13
ENSG00000071205	ARHGAP10
ENSG00000071242	RPS6KA2
ENSG00000071243	ING3
ENSG00000071246	VASH1
ENSG00000071462	BUD23
ENSG00000071537	SEL1L
ENSG00000071539	TRIP13
ENSG00000071553	ATP6AP1
ENSG00000071564	TCF3
ENSG00000071575	TRIB2
ENSG00000071626	DAZAP1
ENSG00000071655	MBD3
ENSG00000071794	HLTF
ENSG00000071859	FAM50A
ENSG00000071889	FAM3A
ENSG00000071894	CPSF1
ENSG00000071967	CYBRD1
ENSG00000071994	PDCD2
ENSG00000072042	RDH11
ENSG00000072062	PRKACA
ENSG00000072110	ACTN1
ENSG00000072121	ZFYVE26
ENSG00000072134	EPN2
ENSG00000072135	PTPN18
ENSG00000072195	SPEG
ENSG00000072210	ALDH3A2
ENSG00000072274	TFRC
ENSG00000072310	SREBF1
ENSG00000072364	AFF4
ENSG00000072401	UBE2D1
ENSG00000072415	MPP5
ENSG00000072422	RHOBTB1
ENSG00000072501	SMC1A
ENSG00000072506	HSD17B10
ENSG00000072518	MARK2
ENSG00000072571	HMMR
ENSG00000072609	CHFR
ENSG00000072657	TRHDE
ENSG00000072682	P4HA2
ENSG00000072736	NFATC3
ENSG00000072756	TRNT1
ENSG00000072778	ACADVL
ENSG00000072786	STK10
ENSG00000072803	FBXW11
ENSG00000072818	ACAP1
ENSG00000072832	CRMP1
ENSG00000072840	EVC
ENSG00000072849	DERL2
ENSG00000072864	NDE1
ENSG00000072954	TMEM38A
ENSG00000072958	AP1M1
ENSG00000073050	XRCC1
ENSG00000073060	SCARB1
ENSG00000073111	MCM2
ENSG00000073146	MOV10L1
ENSG00000073150	PANX2
ENSG00000073169	SELENOO
ENSG00000073331	ALPK1
ENSG00000073350	LLGL2
ENSG00000073417	PDE8A
ENSG00000073464	CLCN4
ENSG00000073536	NLE1
ENSG00000073578	SDHA
ENSG00000073584	SMARCE1
ENSG00000073605	GSDMB
ENSG00000073614	KDM5A
ENSG00000073711	PPP2R3A
ENSG00000073712	FERMT2
ENSG00000073792	IGF2BP2
ENSG00000073803	MAP3K13
ENSG00000073849	ST6GAL1
ENSG00000073910	FRY
ENSG00000073921	PICALM
ENSG00000073969	NSF
ENSG00000074047	GLI2
ENSG00000074054	CLASP1
ENSG00000074071	MRPS34
ENSG00000074201	CLNS1A
ENSG00000074219	TEAD2
ENSG00000074266	EED
ENSG00000074319	TSG101
ENSG00000074356	NCBP3
ENSG00000074410	CA12
ENSG00000074416	MGLL
ENSG00000074527	NTN4
ENSG00000074582	BCS1L
ENSG00000074590	NUAK1
ENSG00000074603	DPP8
ENSG00000074621	SLC24A1
ENSG00000074657	ZNF532
ENSG00000074695	LMAN1
ENSG00000074696	HACD3
ENSG00000074755	ZZEF1
ENSG00000074800	ENO1
ENSG00000074842	MYDGF
ENSG00000074855	ANO8
ENSG00000074935	TUBE1
ENSG00000074964	ARHGEF10L
ENSG00000075089	ACTR6
ENSG00000075131	TIPIN
ENSG00000075142	SRI
ENSG00000075151	EIF4G3
ENSG00000075188	NUP37
ENSG00000075213	SEMA3A
ENSG00000075218	GTSE1
ENSG00000075223	SEMA3C
ENSG00000075234	TTC38
ENSG00000075239	ACAT1
ENSG00000075240	GRAMD4
ENSG00000075275	CELSR1
ENSG00000075292	ZNF638
ENSG00000075303	SLC25A40
ENSG00000075336	TIMM21
ENSG00000075391	RASAL2
ENSG00000075399	VPS9D1
ENSG00000075407	ZNF37A
ENSG00000075413	MARK3
ENSG00000075415	SLC25A3
ENSG00000075420	FNDC3B
ENSG00000075426	FOSL2
ENSG00000075461	CACNG4
ENSG00000075539	FRYL
ENSG00000075568	TMEM131
ENSG00000075618	FSCN1
ENSG00000075624	ACTB
ENSG00000075643	MOCOS
ENSG00000075651	PLD1
ENSG00000075702	WDR62
ENSG00000075711	DLG1
ENSG00000075785	RAB7A
ENSG00000075790	BCAP29
ENSG00000075826	SEC31B
ENSG00000075856	SART3
ENSG00000075891	PAX2
ENSG00000075914	EXOSC7
ENSG00000075945	KIFAP3
ENSG00000075975	MKRN2
ENSG00000076003	MCM6
ENSG00000076043	REXO2
ENSG00000076053	RBM7
ENSG00000076067	RBMS2
ENSG00000076108	BAZ2A
ENSG00000076201	PTPN23
ENSG00000076242	MLH1
ENSG00000076248	UNG
ENSG00000076258	FMO4
ENSG00000076321	KLHL20
ENSG00000076351	SLC46A1
ENSG00000076356	PLXNA2
ENSG00000076382	SPAG5
ENSG00000076513	ANKRD13A
ENSG00000076554	TPD52
ENSG00000076555	ACACB
ENSG00000076604	TRAF4
ENSG00000076641	PAG1
ENSG00000076650	GPATCH1
ENSG00000076685	NT5C2
ENSG00000076706	MCAM
ENSG00000076716	GPC4
ENSG00000076864	RAP1GAP
ENSG00000076924	XAB2
ENSG00000076928	ARHGEF1
ENSG00000076984	MAP2K7
ENSG00000077044	DGKD
ENSG00000077063	CTTNBP2
ENSG00000077092	RARB
ENSG00000077097	TOP2B
ENSG00000077147	TM9SF3
ENSG00000077150	NFKB2
ENSG00000077152	UBE2T
ENSG00000077157	PPP1R12B
ENSG00000077232	DNAJC10
ENSG00000077235	GTF3C1
ENSG00000077238	IL4R
ENSG00000077254	USP33
ENSG00000077312	SNRPA
ENSG00000077348	EXOSC5
ENSG00000077380	DYNC1I2
ENSG00000077454	LRCH4
ENSG00000077458	FAM76B
ENSG00000077463	SIRT6
ENSG00000077514	POLD3
ENSG00000077549	CAPZB
ENSG00000077585	GPR137B
ENSG00000077684	JADE1
ENSG00000077713	SLC25A43
ENSG00000077721	UBE2A
ENSG00000077782	FGFR1
ENSG00000077942	FBLN1
ENSG00000077943	ITGA8
ENSG00000077984	CST7
ENSG00000078018	MAP2
ENSG00000078043	PIAS2
ENSG00000078061	ARAF
ENSG00000078070	MCCC1
ENSG00000078114	NEBL
ENSG00000078124	ACER3
ENSG00000078140	UBE2K
ENSG00000078142	PIK3C3
ENSG00000078177	N4BP2
ENSG00000078237	TIGAR
ENSG00000078246	TULP3
ENSG00000078269	SYNJ2
ENSG00000078304	PPP2R5C
ENSG00000078369	GNB1
ENSG00000078403	MLLT10
ENSG00000078487	ZCWPW1
ENSG00000078618	NRDC
ENSG00000078668	VDAC3
ENSG00000078674	PCM1
ENSG00000078687	TNRC6C
ENSG00000078699	CBFA2T2
ENSG00000078747	ITCH
ENSG00000078804	TP53INP2
ENSG00000078808	SDF4
ENSG00000078902	TOLLIP
ENSG00000078967	UBE2D4
ENSG00000079134	THOC1
ENSG00000079150	FKBP7
ENSG00000079156	OSBPL6
ENSG00000079215	SLC1A3
ENSG00000079246	XRCC5
ENSG00000079263	SP140
ENSG00000079277	MKNK1
ENSG00000079313	REXO1
ENSG00000079332	SAR1A
ENSG00000079335	CDC14A
ENSG00000079337	RAPGEF3
ENSG00000079387	SENP1
ENSG00000079432	CIC
ENSG00000079459	FDFT1
ENSG00000079462	PAFAH1B3
ENSG00000079482	OPHN1
ENSG00000079616	KIF22
ENSG00000079691	CARMIL1
ENSG00000079739	PGM1
ENSG00000079785	DDX1
ENSG00000079805	DNM2
ENSG00000079819	EPB41L2
ENSG00000079950	STX7
ENSG00000079999	KEAP1
ENSG00000080031	PTPRH
ENSG00000080189	SLC35C2
ENSG00000080200	CRYBG3
ENSG00000080298	RFX3
ENSG00000080345	RIF1
ENSG00000080371	RAB21
ENSG00000080503	SMARCA2
ENSG00000080546	SESN1
ENSG00000080561	MID2
ENSG00000080603	SRCAP
ENSG00000080608	PUM3
ENSG00000080802	CNOT4
ENSG00000080815	PSEN1
ENSG00000080819	CPOX
ENSG00000080822	CLDND1
ENSG00000080823	MOK
ENSG00000080824	HSP90AA1
ENSG00000080839	RBL1
ENSG00000080845	DLGAP4
ENSG00000080854	IGSF9B
ENSG00000080986	NDC80
ENSG00000081014	AP4E1
ENSG00000081019	RSBN1
ENSG00000081026	MAGI3
ENSG00000081041	CXCL2
ENSG00000081059	TCF7
ENSG00000081087	OSTM1
ENSG00000081154	PCNP
ENSG00000081177	EXD2
ENSG00000081181	ARG2
ENSG00000081307	UBA5
ENSG00000081320	STK17B
ENSG00000081377	CDC14B
ENSG00000081386	ZNF510
ENSG00000081692	JMJD4
ENSG00000081721	DUSP12
ENSG00000081760	AACS
ENSG00000081791	KIAA0141
ENSG00000081803	CADPS2
ENSG00000081870	HSPB11
ENSG00000081913	PHLPP1
ENSG00000082014	SMARCD3
ENSG00000082068	WDR70
ENSG00000082146	STRADB
ENSG00000082153	BZW1
ENSG00000082212	ME2
ENSG00000082213	C5orf22
ENSG00000082258	CCNT2
ENSG00000082269	FAM135A
ENSG00000082438	COBLL1
ENSG00000082458	DLG3
ENSG00000082497	SERTAD4
ENSG00000082512	TRAF5
ENSG00000082515	MRPL22
ENSG00000082516	GEMIN5
ENSG00000082641	NFE2L1
ENSG00000082701	GSK3B
ENSG00000082781	ITGB5
ENSG00000082805	ERC1
ENSG00000082898	XPO1
ENSG00000082996	RNF13
ENSG00000083093	PALB2
ENSG00000083097	DOPEY1
ENSG00000083099	LYRM2
ENSG00000083123	BCKDHB
ENSG00000083168	KAT6A
ENSG00000083223	ZCCHC6
ENSG00000083312	TNPO1
ENSG00000083444	PLOD1
ENSG00000083457	ITGAE
ENSG00000083520	DIS3
ENSG00000083535	PIBF1
ENSG00000083544	TDRD3
ENSG00000083635	NUFIP1
ENSG00000083642	PDS5B
ENSG00000083720	OXCT1
ENSG00000083750	RRAGB
ENSG00000083799	CYLD
ENSG00000083807	SLC27A5
ENSG00000083812	ZNF324
ENSG00000083814	ZNF671
ENSG00000083817	ZNF416
ENSG00000083828	ZNF586
ENSG00000083838	ZNF446
ENSG00000083844	ZNF264
ENSG00000083845	RPS5
ENSG00000083857	FAT1
ENSG00000083896	YTHDC1
ENSG00000083937	CHMP2B
ENSG00000084070	SMAP2
ENSG00000084072	PPIE
ENSG00000084073	ZMPSTE24
ENSG00000084090	STARD7
ENSG00000084092	NOA1
ENSG00000084093	REST
ENSG00000084112	SSH1
ENSG00000084207	GSTP1
ENSG00000084234	APLP2
ENSG00000084444	FAM234B
ENSG00000084463	WBP11
ENSG00000084623	EIF3I
ENSG00000084636	COL16A1
ENSG00000084652	TXLNA
ENSG00000084676	NCOA1
ENSG00000084693	AGBL5
ENSG00000084731	KIF3C
ENSG00000084733	RAB10
ENSG00000084754	HADHA
ENSG00000084764	MAPRE3
ENSG00000084774	CAD
ENSG00000085063	CD59
ENSG00000085117	CD82
ENSG00000085185	BCORL1
ENSG00000085224	ATRX
ENSG00000085231	AK6
ENSG00000085274	MYNN
ENSG00000085276	MECOM
ENSG00000085365	SCAMP1
ENSG00000085377	PREP
ENSG00000085382	HACE1
ENSG00000085415	SEH1L
ENSG00000085433	WDR47
ENSG00000085449	WDFY1
ENSG00000085491	SLC25A24
ENSG00000085511	MAP3K4
ENSG00000085514	PILRA
ENSG00000085644	ZNF213
ENSG00000085662	AKR1B1
ENSG00000085719	CPNE3
ENSG00000085721	RRN3
ENSG00000085733	CTTN
ENSG00000085760	MTIF2
ENSG00000085788	DDHD2
ENSG00000085832	EPS15
ENSG00000085840	ORC1
ENSG00000085871	MGST2
ENSG00000085872	CHERP
ENSG00000085978	ATG16L1
ENSG00000085982	USP40
ENSG00000085998	POMGNT1
ENSG00000085999	RAD54L
ENSG00000086015	MAST2
ENSG00000086061	DNAJA1
ENSG00000086062	B4GALT1
ENSG00000086065	CHMP5
ENSG00000086102	NFX1
ENSG00000086189	DIMT1
ENSG00000086200	IPO11
ENSG00000086232	EIF2AK1
ENSG00000086289	EPDR1
ENSG00000086475	SEPHS1
ENSG00000086504	MRPL28
ENSG00000086544	ITPKC
ENSG00000086589	RBM22
ENSG00000086598	TMED2
ENSG00000086619	ERO1B
ENSG00000086666	ZFAND6
ENSG00000086696	HSD17B2
ENSG00000086712	TXLNG
ENSG00000086758	HUWE1
ENSG00000086827	ZW10
ENSG00000086848	ALG9
ENSG00000087008	ACOX3
ENSG00000087053	MTMR2
ENSG00000087074	PPP1R15A
ENSG00000087076	HSD17B14
ENSG00000087077	TRIP6
ENSG00000087086	FTL
ENSG00000087087	SRRT
ENSG00000087088	BAX
ENSG00000087095	NLK
ENSG00000087111	PIGS
ENSG00000087116	ADAMTS2
ENSG00000087152	ATXN7L3
ENSG00000087157	PGS1
ENSG00000087191	PSMC5
ENSG00000087206	UIMC1
ENSG00000087245	MMP2
ENSG00000087253	LPCAT2
ENSG00000087258	GNAO1
ENSG00000087263	OGFOD1
ENSG00000087266	SH3BP2
ENSG00000087269	NOP14
ENSG00000087274	ADD1
ENSG00000087299	L2HGDH
ENSG00000087301	TXNDC16
ENSG00000087302	RTRAF
ENSG00000087303	NID2
ENSG00000087338	GMCL1
ENSG00000087365	SF3B2
ENSG00000087448	KLHL42
ENSG00000087460	GNAS
ENSG00000087470	DNM1L
ENSG00000087502	ERGIC2
ENSG00000087510	TFAP2C
ENSG00000087586	AURKA
ENSG00000087842	PIR
ENSG00000087884	AAMDC
ENSG00000087903	RFX2
ENSG00000087995	METTL2A
ENSG00000088035	ALG6
ENSG00000088038	CNOT3
ENSG00000088179	PTPN4
ENSG00000088205	DDX18
ENSG00000088247	KHSRP
ENSG00000088256	GNA11
ENSG00000088280	ASAP3
ENSG00000088298	EDEM2
ENSG00000088305	DNMT3B
ENSG00000088325	TPX2
ENSG00000088356	PDRG1
ENSG00000088367	EPB41L1
ENSG00000088387	DOCK9
ENSG00000088448	ANKRD10
ENSG00000088451	TGDS
ENSG00000088543	C3orf18
ENSG00000088682	COQ9
ENSG00000088727	KIF9
ENSG00000088756	ARHGAP28
ENSG00000088766	CRLS1
ENSG00000088808	PPP1R13B
ENSG00000088812	ATRN
ENSG00000088826	SMOX
ENSG00000088832	FKBP1A
ENSG00000088833	NSFL1C
ENSG00000088836	SLC4A11
ENSG00000088854	C20orf194
ENSG00000088876	ZNF343
ENSG00000088881	EBF4
ENSG00000088888	MAVS
ENSG00000088899	LZTS3
ENSG00000088930	XRN2
ENSG00000088970	KIZ
ENSG00000088986	DYNLL1
ENSG00000089006	SNX5
ENSG00000089009	RPL6
ENSG00000089022	MAPKAPK5
ENSG00000089041	P2RX7
ENSG00000089048	ESF1
ENSG00000089050	RBBP9
ENSG00000089053	ANAPC5
ENSG00000089057	SLC23A2
ENSG00000089060	SLC8B1
ENSG00000089063	TMEM230
ENSG00000089091	DZANK1
ENSG00000089094	KDM2B
ENSG00000089123	TASP1
ENSG00000089127	OAS1
ENSG00000089154	GCN1
ENSG00000089157	RPLP0
ENSG00000089159	PXN
ENSG00000089163	SIRT4
ENSG00000089177	KIF16B
ENSG00000089195	TRMT6
ENSG00000089220	PEBP1
ENSG00000089234	BRAP
ENSG00000089248	ERP29
ENSG00000089280	FUS
ENSG00000089289	IGBP1
ENSG00000089327	FXYD5
ENSG00000089335	ZNF302
ENSG00000089351	GRAMD1A
ENSG00000089486	CDIP1
ENSG00000089505	CMTM1
ENSG00000089597	GANAB
ENSG00000089639	GMIP
ENSG00000089682	RBM41
ENSG00000089685	BIRC5
ENSG00000089693	MLF2
ENSG00000089737	DDX24
ENSG00000089775	ZBTB25
ENSG00000089820	ARHGAP4
ENSG00000089876	DHX32
ENSG00000089902	RCOR1
ENSG00000089916	GPATCH2L
ENSG00000090006	LTBP4
ENSG00000090013	BLVRB
ENSG00000090020	SLC9A1
ENSG00000090054	SPTLC1
ENSG00000090060	PAPOLA
ENSG00000090061	CCNK
ENSG00000090097	PCBP4
ENSG00000090238	YPEL3
ENSG00000090263	MRPS33
ENSG00000090266	NDUFB2
ENSG00000090273	NUDC
ENSG00000090316	MAEA
ENSG00000090339	ICAM1
ENSG00000090372	STRN4
ENSG00000090432	MUL1
ENSG00000090447	TFAP4
ENSG00000090470	PDCD7
ENSG00000090487	SPG21
ENSG00000090520	DNAJB11
ENSG00000090530	P3H2
ENSG00000090565	RAB11FIP3
ENSG00000090581	GNPTG
ENSG00000090612	ZNF268
ENSG00000090615	GOLGA3
ENSG00000090621	PABPC4
ENSG00000090661	CERS4
ENSG00000090674	MCOLN1
ENSG00000090686	USP48
ENSG00000090776	EFNB1
ENSG00000090857	PDPR
ENSG00000090861	AARS
ENSG00000090863	GLG1
ENSG00000090889	KIF4A
ENSG00000090905	TNRC6A
ENSG00000090924	PLEKHG2
ENSG00000090971	NAT14
ENSG00000090975	PITPNM2
ENSG00000090989	EXOC1
ENSG00000091009	RBM27
ENSG00000091039	OSBPL8
ENSG00000091073	DTX2
ENSG00000091127	PUS7
ENSG00000091128	LAMB4
ENSG00000091129	NRCAM
ENSG00000091136	LAMB1
ENSG00000091140	DLD
ENSG00000091157	WDR7
ENSG00000091164	TXNL1
ENSG00000091317	CMTM6
ENSG00000091409	ITGA6
ENSG00000091436	MAP3K20
ENSG00000091482	SMPX
ENSG00000091483	FH
ENSG00000091490	SEL1L3
ENSG00000091527	CDV3
ENSG00000091542	ALKBH5
ENSG00000091592	NLRP1
ENSG00000091640	SPAG7
ENSG00000091651	ORC6
ENSG00000091732	ZC3HC1
ENSG00000091844	RGS17
ENSG00000091947	TMEM101
ENSG00000091986	CCDC80
ENSG00000092010	PSME1
ENSG00000092020	PPP2R3C
ENSG00000092036	HAUS4
ENSG00000092068	SLC7A8
ENSG00000092094	OSGEP
ENSG00000092096	SLC22A17
ENSG00000092098	RNF31
ENSG00000092108	SCFD1
ENSG00000092140	G2E3
ENSG00000092148	HECTD1
ENSG00000092199	HNRNPC
ENSG00000092201	SUPT16H
ENSG00000092203	TOX4
ENSG00000092208	GEMIN2
ENSG00000092295	TGM1
ENSG00000092330	TINF2
ENSG00000092439	TRPM7
ENSG00000092445	TYRO3
ENSG00000092470	WDR76
ENSG00000092531	SNAP23
ENSG00000092607	TBX15
ENSG00000092621	PHGDH
ENSG00000092758	COL9A3
ENSG00000092820	EZR
ENSG00000092841	MYL6
ENSG00000092847	AGO1
ENSG00000092853	CLSPN
ENSG00000092871	RFFL
ENSG00000092929	UNC13D
ENSG00000092931	MFSD11
ENSG00000092964	DPYSL2
ENSG00000092969	TGFB2
ENSG00000092978	GPATCH2
ENSG00000093000	NUP50
ENSG00000093009	CDC45
ENSG00000093010	COMT
ENSG00000093144	ECHDC1
ENSG00000093167	LRRFIP2
ENSG00000093183	SEC22C
ENSG00000093217	XYLB
ENSG00000094631	HDAC6
ENSG00000094804	CDC6
ENSG00000094841	UPRT
ENSG00000094880	CDC23
ENSG00000094914	AAAS
ENSG00000094916	CBX5
ENSG00000094975	SUCO
ENSG00000095002	MSH2
ENSG00000095015	MAP3K1
ENSG00000095059	DHPS
ENSG00000095066	HOOK2
ENSG00000095139	ARCN1
ENSG00000095209	TMEM38B
ENSG00000095261	PSMD5
ENSG00000095319	NUP188
ENSG00000095321	CRAT
ENSG00000095380	NANS
ENSG00000095383	TBC1D2
ENSG00000095397	WHRN
ENSG00000095485	CWF19L1
ENSG00000095564	BTAF1
ENSG00000095574	IKZF5
ENSG00000095739	BAMBI
ENSG00000095787	WAC
ENSG00000095794	CREM
ENSG00000095906	NUBP2
ENSG00000095951	HIVEP1
ENSG00000096060	FKBP5
ENSG00000096063	SRPK1
ENSG00000096070	BRPF3
ENSG00000096080	MRPS18A
ENSG00000096092	TMEM14A
ENSG00000096093	EFHC1
ENSG00000096384	HSP90AB1
ENSG00000096401	CDC5L
ENSG00000096433	ITPR3
ENSG00000096654	ZNF184
ENSG00000096717	SIRT1
ENSG00000096746	HNRNPH3
ENSG00000096872	IFT74
ENSG00000096968	JAK2
ENSG00000096996	IL12RB1
ENSG00000097007	ABL1
ENSG00000097021	ACOT7
ENSG00000097033	SH3GLB1
ENSG00000097046	CDC7
ENSG00000097096	SYDE2
ENSG00000099194	SCD
ENSG00000099203	TMED1
ENSG00000099219	ERMP1
ENSG00000099246	RAB18
ENSG00000099250	NRP1
ENSG00000099256	PRTFDC1
ENSG00000099282	TSPAN15
ENSG00000099290	WASHC2A
ENSG00000099308	MAST3
ENSG00000099330	OCEL1
ENSG00000099331	MYO9B
ENSG00000099341	PSMD8
ENSG00000099364	FBXL19
ENSG00000099377	HSD3B7
ENSG00000099381	SETD1A
ENSG00000099385	BCL7C
ENSG00000099622	CIRBP
ENSG00000099624	ATP5D
ENSG00000099625	CBARP
ENSG00000099783	HNRNPM
ENSG00000099785	MARCH2
ENSG00000099795	NDUFB7
ENSG00000099797	TECR
ENSG00000099800	TIMM13
ENSG00000099804	CDC34
ENSG00000099810	MTAP
ENSG00000099814	CEP170B
ENSG00000099817	POLR2E
ENSG00000099821	POLRMT
ENSG00000099822	HCN2
ENSG00000099840	IZUMO4
ENSG00000099849	RASSF7
ENSG00000099860	GADD45B
ENSG00000099864	PALM
ENSG00000099875	MKNK2
ENSG00000099889	ARVCF
ENSG00000099899	TRMT2A
ENSG00000099901	RANBP1
ENSG00000099904	ZDHHC8
ENSG00000099910	KLHL22
ENSG00000099917	MED15
ENSG00000099940	SNAP29
ENSG00000099942	CRKL
ENSG00000099949	LZTR1
ENSG00000099956	SMARCB1
ENSG00000099957	P2RX6
ENSG00000099968	BCL2L13
ENSG00000099977	DDT
ENSG00000099991	CABIN1
ENSG00000099992	TBC1D10A
ENSG00000099994	SUSD2
ENSG00000099995	SF3A1
ENSG00000099998	GGT5
ENSG00000099999	RNF215
ENSG00000100003	SEC14L2
ENSG00000100014	SPECC1L
ENSG00000100023	PPIL2
ENSG00000100028	SNRPD3
ENSG00000100029	PES1
ENSG00000100030	MAPK1
ENSG00000100031	GGT1
ENSG00000100034	PPM1F
ENSG00000100036	SLC35E4
ENSG00000100038	TOP3B
ENSG00000100056	ESS2
ENSG00000100065	CARD10
ENSG00000100068	LRP5L
ENSG00000100075	SLC25A1
ENSG00000100077	GRK3
ENSG00000100083	GGA1
ENSG00000100084	HIRA
ENSG00000100097	LGALS1
ENSG00000100099	HPS4
ENSG00000100104	SRRD
ENSG00000100105	PATZ1
ENSG00000100106	TRIOBP
ENSG00000100109	TFIP11
ENSG00000100116	GCAT
ENSG00000100124	ANKRD54
ENSG00000100129	EIF3L
ENSG00000100138	SNU13
ENSG00000100139	MICALL1
ENSG00000100147	CCDC134
ENSG00000100150	DEPDC5
ENSG00000100151	PICK1
ENSG00000100162	CENPM
ENSG00000100167	SEPT3
ENSG00000100196	KDELR3
ENSG00000100201	DDX17
ENSG00000100207	TCF20
ENSG00000100209	HSCB
ENSG00000100211	CBY1
ENSG00000100216	TOMM22
ENSG00000100219	XBP1
ENSG00000100220	RTCB
ENSG00000100221	JOSD1
ENSG00000100225	FBXO7
ENSG00000100226	GTPBP1
ENSG00000100227	POLDIP3
ENSG00000100228	RAB36
ENSG00000100234	TIMP3
ENSG00000100239	PPP6R2
ENSG00000100241	SBF1
ENSG00000100242	SUN2
ENSG00000100243	CYB5R3
ENSG00000100246	DNAL4
ENSG00000100258	LMF2
ENSG00000100263	RHBDD3
ENSG00000100266	PACSIN2
ENSG00000100271	TTLL1
ENSG00000100280	AP1B1
ENSG00000100281	HMGXB4
ENSG00000100284	TOM1
ENSG00000100288	CHKB
ENSG00000100292	HMOX1
ENSG00000100294	MCAT
ENSG00000100296	THOC5
ENSG00000100297	MCM5
ENSG00000100299	ARSA
ENSG00000100300	TSPO
ENSG00000100304	TTLL12
ENSG00000100307	CBX7
ENSG00000100311	PDGFB
ENSG00000100316	RPL3
ENSG00000100319	ZMAT5
ENSG00000100320	RBFOX2
ENSG00000100321	SYNGR1
ENSG00000100324	TAB1
ENSG00000100325	ASCC2
ENSG00000100330	MTMR3
ENSG00000100335	MIEF1
ENSG00000100342	APOL1
ENSG00000100344	PNPLA3
ENSG00000100345	MYH9
ENSG00000100347	SAMM50
ENSG00000100348	TXN2
ENSG00000100350	FOXRED2
ENSG00000100353	EIF3D
ENSG00000100354	TNRC6B
ENSG00000100359	SGSM3
ENSG00000100360	IFT27
ENSG00000100364	KIAA0930
ENSG00000100372	SLC25A17
ENSG00000100376	FAM118A
ENSG00000100379	KCTD17
ENSG00000100380	ST13
ENSG00000100385	IL2RB
ENSG00000100387	RBX1
ENSG00000100393	EP300
ENSG00000100395	L3MBTL2
ENSG00000100401	RANGAP1
ENSG00000100403	ZC3H7B
ENSG00000100410	PHF5A
ENSG00000100412	ACO2
ENSG00000100413	POLR3H
ENSG00000100416	TRMU
ENSG00000100417	PMM1
ENSG00000100418	DESI1
ENSG00000100422	CERK
ENSG00000100425	BRD1
ENSG00000100426	ZBED4
ENSG00000100427	MLC1
ENSG00000100429	HDAC10
ENSG00000100439	ABHD4
ENSG00000100441	KHNYN
ENSG00000100442	FKBP3
ENSG00000100445	SDR39U1
ENSG00000100461	RBM23
ENSG00000100462	PRMT5
ENSG00000100478	AP4S1
ENSG00000100479	POLE2
ENSG00000100483	VCPKMT
ENSG00000100485	SOS2
ENSG00000100490	CDKL1
ENSG00000100503	NIN
ENSG00000100504	PYGL
ENSG00000100505	TRIM9
ENSG00000100519	PSMC6
ENSG00000100522	GNPNAT1
ENSG00000100523	DDHD1
ENSG00000100526	CDKN3
ENSG00000100528	CNIH1
ENSG00000100532	CGRRF1
ENSG00000100554	ATP6V1D
ENSG00000100564	PIGH
ENSG00000100567	PSMA3
ENSG00000100568	VTI1B
ENSG00000100575	TIMM9
ENSG00000100577	GSTZ1
ENSG00000100578	KIAA0586
ENSG00000100580	TMED8
ENSG00000100583	SAMD15
ENSG00000100591	AHSA1
ENSG00000100592	DAAM1
ENSG00000100596	SPTLC2
ENSG00000100599	RIN3
ENSG00000100600	LGMN
ENSG00000100601	ALKBH1
ENSG00000100603	SNW1
ENSG00000100605	ITPK1
ENSG00000100612	DHRS7
ENSG00000100614	PPM1A
ENSG00000100625	SIX4
ENSG00000100629	CEP128
ENSG00000100632	ERH
ENSG00000100644	HIF1A
ENSG00000100647	SUSD6
ENSG00000100650	SRSF5
ENSG00000100664	EIF5
ENSG00000100697	DICER1
ENSG00000100711	ZFYVE21
ENSG00000100714	MTHFD1
ENSG00000100722	ZC3H14
ENSG00000100726	TELO2
ENSG00000100731	PCNX1
ENSG00000100744	GSKIP
ENSG00000100749	VRK1
ENSG00000100764	PSMC1
ENSG00000100784	RPS6KA5
ENSG00000100796	PPP4R3A
ENSG00000100802	C14orf93
ENSG00000100804	PSMB5
ENSG00000100811	YY1
ENSG00000100813	ACIN1
ENSG00000100814	CCNB1IP1
ENSG00000100815	TRIP11
ENSG00000100823	APEX1
ENSG00000100836	PABPN1
ENSG00000100842	EFS
ENSG00000100852	ARHGAP5
ENSG00000100865	CINP
ENSG00000100883	SRP54
ENSG00000100888	CHD8
ENSG00000100889	PCK2
ENSG00000100890	KIAA0391
ENSG00000100897	DCAF11
ENSG00000100902	PSMA6
ENSG00000100906	NFKBIA
ENSG00000100908	EMC9
ENSG00000100911	PSME2
ENSG00000100916	BRMS1L
ENSG00000100918	REC8
ENSG00000100926	TM9SF1
ENSG00000100934	SEC23A
ENSG00000100938	GMPR2
ENSG00000100941	PNN
ENSG00000100949	RABGGTA
ENSG00000100968	NFATC4
ENSG00000100982	PCIF1
ENSG00000100983	GSS
ENSG00000100991	TRPC4AP
ENSG00000100994	PYGB
ENSG00000100997	ABHD12
ENSG00000101000	PROCR
ENSG00000101003	GINS1
ENSG00000101004	NINL
ENSG00000101019	UQCC1
ENSG00000101040	ZMYND8
ENSG00000101052	IFT52
ENSG00000101057	MYBL2
ENSG00000101079	NDRG3
ENSG00000101084	C20orf24
ENSG00000101104	PABPC1L
ENSG00000101109	STK4
ENSG00000101126	ADNP
ENSG00000101132	PFDN4
ENSG00000101134	DOK5
ENSG00000101138	CSTF1
ENSG00000101144	BMP7
ENSG00000101146	RAE1
ENSG00000101150	TPD52L2
ENSG00000101152	DNAJC5
ENSG00000101158	NELFCD
ENSG00000101160	CTSZ
ENSG00000101161	PRPF6
ENSG00000101166	PRELID3B
ENSG00000101181	MTG2
ENSG00000101182	PSMA7
ENSG00000101187	SLCO4A1
ENSG00000101189	MRGBP
ENSG00000101190	TCFL5
ENSG00000101191	DIDO1
ENSG00000101193	GID8
ENSG00000101199	ARFGAP1
ENSG00000101210	EEF1A2
ENSG00000101216	GMEB2
ENSG00000101220	C20orf27
ENSG00000101222	SPEF1
ENSG00000101224	CDC25B
ENSG00000101236	RNF24
ENSG00000101246	ARFRP1
ENSG00000101247	NDUFAF5
ENSG00000101255	TRIB3
ENSG00000101265	RASSF2
ENSG00000101266	CSNK2A1
ENSG00000101290	CDS2
ENSG00000101294	HM13
ENSG00000101298	SNPH
ENSG00000101310	SEC23B
ENSG00000101333	PLCB4
ENSG00000101337	TM9SF4
ENSG00000101343	CRNKL1
ENSG00000101346	POFUT1
ENSG00000101347	SAMHD1
ENSG00000101350	KIF3B
ENSG00000101353	MROH8
ENSG00000101361	NOP56
ENSG00000101363	MANBAL
ENSG00000101365	IDH3B
ENSG00000101367	MAPRE1
ENSG00000101384	JAG1
ENSG00000101391	CDK5RAP1
ENSG00000101400	SNTA1
ENSG00000101407	TTI1
ENSG00000101412	E2F1
ENSG00000101413	RPRD1B
ENSG00000101417	PXMP4
ENSG00000101421	CHMP4B
ENSG00000101439	CST3
ENSG00000101442	ACTR5
ENSG00000101444	AHCY
ENSG00000101447	FAM83D
ENSG00000101452	DHX35
ENSG00000101457	DNTTIP1
ENSG00000101460	MAP1LC3A
ENSG00000101463	SYNDIG1
ENSG00000101464	PIGU
ENSG00000101473	ACOT8
ENSG00000101474	APMAP
ENSG00000101493	ZNF516
ENSG00000101544	ADNP2
ENSG00000101546	RBFA
ENSG00000101557	USP14
ENSG00000101558	VAPA
ENSG00000101574	METTL4
ENSG00000101577	LPIN2
ENSG00000101608	MYL12A
ENSG00000101624	CEP76
ENSG00000101639	CEP192
ENSG00000101654	RNMT
ENSG00000101665	SMAD7
ENSG00000101745	ANKRD12
ENSG00000101751	POLI
ENSG00000101752	MIB1
ENSG00000101773	RBBP8
ENSG00000101782	RIOK3
ENSG00000101811	CSTF2
ENSG00000101843	PSMD10
ENSG00000101844	ATG4A
ENSG00000101849	TBL1X
ENSG00000101856	PGRMC1
ENSG00000101868	POLA1
ENSG00000101871	MID1
ENSG00000101882	NKAP
ENSG00000101888	NXT2
ENSG00000101901	ALG13
ENSG00000101911	PRPS2
ENSG00000101928	MOSPD1
ENSG00000101935	AMMECR1
ENSG00000101940	WDR13
ENSG00000101955	SRPX
ENSG00000101966	XIAP
ENSG00000101972	STAG2
ENSG00000101974	ATP11C
ENSG00000101986	ABCD1
ENSG00000101997	CCDC22
ENSG00000102003	SYP
ENSG00000102007	PLP2
ENSG00000102024	PLS3
ENSG00000102030	NAA10
ENSG00000102034	ELF4
ENSG00000102038	SMARCA1
ENSG00000102048	ASB9
ENSG00000102054	RBBP7
ENSG00000102057	KCND1
ENSG00000102078	SLC25A14
ENSG00000102081	FMR1
ENSG00000102096	PIM2
ENSG00000102100	SLC35A2
ENSG00000102103	PQBP1
ENSG00000102109	PCSK1N
ENSG00000102119	EMD
ENSG00000102125	TAZ
ENSG00000102144	PGK1
ENSG00000102158	MAGT1
ENSG00000102172	SMS
ENSG00000102178	UBL4A
ENSG00000102181	CD99L2
ENSG00000102189	EEA1
ENSG00000102218	RP2
ENSG00000102221	JADE3
ENSG00000102225	CDK16
ENSG00000102226	USP11
ENSG00000102241	HTATSF1
ENSG00000102265	TIMP1
ENSG00000102271	KLHL4
ENSG00000102287	GABRE
ENSG00000102302	FGD1
ENSG00000102309	PIN4
ENSG00000102312	PORCN
ENSG00000102316	MAGED2
ENSG00000102317	RBM3
ENSG00000102359	SRPX2
ENSG00000102384	CENPI
ENSG00000102390	PBDC1
ENSG00000102393	GLA
ENSG00000102401	ARMCX3
ENSG00000102452	NALCN
ENSG00000102471	NDFIP2
ENSG00000102531	FNDC3A
ENSG00000102543	CDADC1
ENSG00000102547	CAB39L
ENSG00000102554	KLF5
ENSG00000102572	STK24
ENSG00000102580	DNAJC3
ENSG00000102595	UGGT2
ENSG00000102606	ARHGEF7
ENSG00000102710	SUPT20H
ENSG00000102738	MRPS31
ENSG00000102743	SLC25A15
ENSG00000102753	KPNA3
ENSG00000102760	RGCC
ENSG00000102763	VWA8
ENSG00000102780	DGKH
ENSG00000102781	KATNAL1
ENSG00000102786	INTS6
ENSG00000102796	DHRS12
ENSG00000102804	TSC22D1
ENSG00000102805	CLN5
ENSG00000102858	MGRN1
ENSG00000102870	ZNF629
ENSG00000102871	TRADD
ENSG00000102878	HSF4
ENSG00000102879	CORO1A
ENSG00000102882	MAPK3
ENSG00000102886	GDPD3
ENSG00000102890	ELMO3
ENSG00000102893	PHKB
ENSG00000102897	LYRM1
ENSG00000102898	NUTF2
ENSG00000102900	NUP93
ENSG00000102901	CENPT
ENSG00000102904	TSNAXIP1
ENSG00000102908	NFAT5
ENSG00000102910	LONP2
ENSG00000102921	N4BP1
ENSG00000102931	ARL2BP
ENSG00000102967	DHODH
ENSG00000102974	CTCF
ENSG00000102977	ACD
ENSG00000102978	POLR2C
ENSG00000102981	PARD6A
ENSG00000102984	ZNF821
ENSG00000102996	MMP15
ENSG00000103005	USB1
ENSG00000103018	CYB5B
ENSG00000103021	CCDC113
ENSG00000103024	NME3
ENSG00000103034	NDRG4
ENSG00000103035	PSMD7
ENSG00000103037	SETD6
ENSG00000103042	SLC38A7
ENSG00000103043	VAC14
ENSG00000103047	TANGO6
ENSG00000103051	COG4
ENSG00000103061	SLC7A6OS
ENSG00000103064	SLC7A6
ENSG00000103066	PLA2G15
ENSG00000103091	WDR59
ENSG00000103111	MON1B
ENSG00000103121	CMC2
ENSG00000103126	AXIN1
ENSG00000103145	HCFC1R1
ENSG00000103148	NPRL3
ENSG00000103150	MLYCD
ENSG00000103152	MPG
ENSG00000103154	NECAB2
ENSG00000103160	HSDL1
ENSG00000103168	TAF1C
ENSG00000103174	NAGPA
ENSG00000103187	COTL1
ENSG00000103194	USP10
ENSG00000103196	CRISPLD2
ENSG00000103197	TSC2
ENSG00000103199	ZNF500
ENSG00000103202	NME4
ENSG00000103222	ABCC1
ENSG00000103226	NOMO3
ENSG00000103227	LMF1
ENSG00000103241	FOXF1
ENSG00000103245	NARFL
ENSG00000103248	MTHFSD
ENSG00000103249	CLCN7
ENSG00000103253	HAGHL
ENSG00000103254	FAM173A
ENSG00000103257	SLC7A5
ENSG00000103260	METRN
ENSG00000103264	FBXO31
ENSG00000103266	STUB1
ENSG00000103269	RHBDL1
ENSG00000103274	NUBP1
ENSG00000103275	UBE2I
ENSG00000103319	EEF2K
ENSG00000103326	CAPN15
ENSG00000103335	PIEZO1
ENSG00000103342	GSPT1
ENSG00000103343	ZNF174
ENSG00000103351	CLUAP1
ENSG00000103353	UBFD1
ENSG00000103356	EARS2
ENSG00000103363	ELOB
[truncated: 9,871 more rows]
